# Supplementary material for: Identification of Transcription Factors Involved in the Regulation of Flowering in Adonis Amurensis Through Combined RNA-seq Transcriptomics and iTRAQ Proteomics
Source: Genes (Basel). 2019 Apr 18;10(4):305. doi: 10.3390/genes10040305 (PMC6523232; doi:10.3390/genes10040305)
Supplement: Supplementary file 1 [file genes-10-00305-s001.zip › Supplementary Table S1.xls]

## Sheet: Table S1
Table S1. 123 key transcription factors were identified in A. amurensis by combining RNA-seq and iTRAQ
gene_id	FBD_FPKM	YA_FPKM	VCA_FPKM	EFS_FPKM	FBS_FPKM	SFS_FPKM	Nr	Nt	Swissprot	KEGG	KOG	Interpro	GO
CL11382_Contig7_All	0	0	6.92	8.94	3.04	3.47	gi|225453042|ref|XP_002265478.1|/0.0e+00/PREDICTED: cell division cycle 5-like protein [Vitis vinifera] >gi|731417257|ref|XP_010660227.1| PREDICTED: cell division cycle 5-like protein [Vitis vinifera]	gi|720095805|ref|XM_010248492.1|/0/PREDICTED: Nelumbo nucifera cell division cycle 5-like protein (LOC104589994), mRNA	sp|P92948|CDC5L_ARATH/0.0e+00/Cell division cycle 5-like protein OS=Arabidopsis thaliana GN=CDC5 PE=1 SV=2	nnu:104589994/0.0e+00/cell division cycle 5-like protein; K12860 pre-mRNA-splicing factor CDC5/CEF1	At1g09770/0.0e+00/[AD] KOG0050 mRNA splicing protein CDC5 (Myb superfamily)	SM00717/9.5E-13/SANT SWI3, ADA2, N-CoR and TFIIIB'' DNA-binding domains	biological_process:GO:0050832//defense response to fungus;GO:0010204//defense response signaling pathway, resistance gene-independent;GO:0051301//cell division;GO:0009870//defense response signaling pathway, resistance gene-dependent;GO:0042742//defense response to bacterium;cellular_component:GO:0009507//chloroplast;molecular_function:GO:0003677//DNA binding;
CL11475_Contig2_All	0	0	8.46	0	0	3.58	gi|719974913|ref|XP_010246167.1|/1.4e-141/PREDICTED: bifunctional nitrilase/nitrile hydratase NIT4B [Nelumbo nucifera]	gi|349704709|emb|FQ383669.1|/2.77075e-68/Vitis vinifera clone SS0ABG1YC09	sp|Q42966|NRL4B_TOBAC/5.3e-115/Bifunctional nitrilase/nitrile hydratase NIT4B OS=Nicotiana tabacum GN=NIT4B PE=2 SV=1	nnu:104589516/2.1e-142/bifunctional nitrilase/nitrile hydratase NIT4B; K13035 beta-cyano-L-alanine hydratase/nitrilase [EC:3.5.5.4 4.2.1.65]	At5g22300/2.7e-110/[E] KOG0805 Carbon-nitrogen hydrolase	PF00795/8.9E-58/Carbon-nitrogen hydrolase	NA
CL11588_Contig1_All	0	10.21	6.8	0.52	3.89	2.96	gi|720038637|ref|XP_010268044.1|/5.3e-96/PREDICTED: myb-related protein P-like [Nelumbo nucifera]	gi|1000966295|ref|XM_015719209.1|/5.85105e-89/PREDICTED: Ricinus communis myb-related protein Myb4 (LOC8258777), mRNA	sp|O22264|MYB12_ARATH/1.0e-65/Transcription factor MYB12 OS=Arabidopsis thaliana GN=MYB12 PE=2 SV=1	nnu:104605119/8.0e-97/myb-related protein P-like; K09422 myb proto-oncogene protein, plant	At2g47460/2.7e-65/[K] KOG0048 Transcription factor, Myb superfamily	PS51294/17.421/Myb-type HTH DNA-binding domain profile.	NA
CL11821_Contig3_All	0.09	11.48	7.9	4.79	7.2	11.08	gi|720061874|ref|XP_010275314.1|/3.7e-161/PREDICTED: two-component response regulator-like APRR2 isoform X1 [Nelumbo nucifera] >gi|720061877|ref|XP_010275315.1| PREDICTED: two-component response regulator-like APRR2 isoform X1 [Nelumbo nucifera] >gi|720061880|ref|XP_010275317.1| PREDICTED: two-component response regulator-like APRR2 isoform X1 [Nelumbo nucifera] >gi|720061884|ref|XP_010275318.1| …	NA	sp|Q6LA43|APRR2_ARATH/4.9e-95/Two-component response regulator-like APRR2 OS=Arabidopsis thaliana GN=APRR2 PE=2 SV=2	vvi:104882333/1.3e-20/two-component response regulator-like PRR95; K14491 two-component response regulator ARR-B family	At4g18020/2.3e-91/[K] KOG1601 GATA-4/5/6 transcription factors	PS50110/12.682/Response regulatory domain profile.	NA
CL11970_Contig1_All	0.04	23.33	63.13	32.1	8.63	5.69	gi|551665923|ref|XP_005835723.1|/8.8e-08/hypothetical protein GUITHDRAFT_105372 [Guillardia theta CCMP2712] >gi|428179874|gb|EKX48743.1| hypothetical protein GUITHDRAFT_105372 [Guillardia theta CCMP2712]	gi|800928642|gb|KP331537.1|/0/Aquilegia coerulea TCP4 mRNA, complete cds	sp|Q8LPR5|TCP4_ARATH/2.5e-101/Transcription factor TCP4 OS=Arabidopsis thaliana GN=TCP4 PE=2 SV=1	sot:102597827/3.6e-06/flowering time control protein FY; K15542 polyadenylation factor subunit 2	At4g24130/3.9e-29/[S] LSE0063 A Uncharacterized protein	PTHR31072:SF3/5.9E-153/--	NA
CL11987_Contig3_All	0	8.9	11.6	10.77	6.43	9.31	gi|720093422|ref|XP_010246046.1|/5.5e-122/PREDICTED: uncharacterized zinc finger protein At4g06634 [Nelumbo nucifera]	gi|659090400|ref|XM_008447775.1|/1.57941e-105/PREDICTED: Cucumis melo uncharacterized zinc finger protein At4g06634 (LOC103488858), mRNA	sp|Q2V3L3|Y4634_ARATH/5.9e-106/Uncharacterized zinc finger protein At4g06634 OS=Arabidopsis thaliana GN=At4g06634 PE=1 SV=1	csv:101218905/2.9e-115/uncharacterized zinc finger protein At4g06634; K09201 transcription factor YY	Hs17442049/1.8e-32/[R] KOG1721 FOG: Zn-finger	PS50157/11.219/Zinc finger C2H2 type domain profile.	molecular_function:GO:0046872//metal ion binding;GO:0043565//sequence-specific DNA binding;
CL12256_Contig1_All	0.07	24.55	21.1	15.35	22.78	33.33	gi|720042533|ref|XP_010269269.1|/0.0e+00/PREDICTED: calmodulin-binding transcription activator 3-like isoform X1 [Nelumbo nucifera] >gi|720042536|ref|XP_010269270.1| PREDICTED: calmodulin-binding transcription activator 3-like isoform X1 [Nelumbo nucifera] >gi|720042539|ref|XP_010269271.1| PREDICTED: calmodulin-binding transcription activator 3-like isoform X1 [Nelumbo nucifera]	gi|720042541|ref|XM_010270970.1|/3.33286e-135/PREDICTED: Nelumbo nucifera calmodulin-binding transcription activator 3-like (LOC104605988), transcript variant X4, mRNA	sp|Q6NPP4|CMTA2_ARATH/3.7e-262/Calmodulin-binding transcription activator 2 OS=Arabidopsis thaliana GN=CMTA2 PE=1 SV=1	apro:F751_6987/2.0e-28/Triacylglycerol lipase SDP1; K14674 TAG lipase / steryl ester hydrolase / phospholipase A2 / LPA acyltransferase [EC:3.1.1.3 3.1.1.13 3.1.1.4 2.3.1.51]	At2g22300/1.6e-195/[S] KOG0520 Uncharacterized conserved protein, contains IPT/TIG domain	PS50297/16.918/Ankyrin repeat region circular profile.	biological_process:GO:0006950//response to stress;
CL12313_Contig2_All	0	17.35	0	0	0	10.35	gi|720072051|ref|XP_010278242.1|/6.5e-152/PREDICTED: splicing factor U2af small subunit B-like [Nelumbo nucifera] >gi|720072054|ref|XP_010278244.1| PREDICTED: splicing factor U2af small subunit B-like [Nelumbo nucifera]	gi|720072057|ref|XR_737822.1|/6.75199e-171/PREDICTED: Nelumbo nucifera splicing factor U2af small subunit B-like (LOC104612506), transcript variant X3, misc_RNA	sp|Q9FMY5|U2AFB_ARATH/1.5e-114/Splicing factor U2af small subunit B OS=Arabidopsis thaliana GN=U2AF35B PE=2 SV=1	nnu:104612506/9.9e-153/splicing factor U2af small subunit B-like; K12836 splicing factor U2AF 35 kDa subunit	At5g42820/4.0e-114/[A] KOG2202 U2 snRNP splicing factor, small subunit, and related proteins	PS50102/11.673/Eukaryotic RNA Recognition Motif (RRM) profile.	biological_process:GO:0000398//mRNA splicing, via spliceosome;cellular_component:GO:0089701//U2AF;molecular_function:GO:0003723//RNA binding;GO:0046872//metal ion binding;GO:0000166//nucleotide binding;
CL1271_Contig5_All	0	7.1	4.65	2.32	4.63	2.49	gi|720045977|ref|XP_010270368.1|/2.9e-75/PREDICTED: uncharacterized protein LOC104606720 [Nelumbo nucifera]	NA	NA	nnu:104606720/4.4e-76/uncharacterized LOC104606720; K15032 mTERF domain-containing protein, mitochondrial	At5g07900/2.8e-59/[KR] KOG1267 Mitochondrial transcription termination factor, mTERF	PTHR13068:SF28/3.9E-108/--	NA
CL1271_Contig7_All	0.09	9.03	10.16	11.52	24.68	71.68	gi|720010010|ref|XP_010259112.1|/8.1e-184/PREDICTED: serine/threonine-protein kinase HT1-like [Nelumbo nucifera]	gi|720010009|ref|XM_010260810.1|/0/PREDICTED: Nelumbo nucifera serine/threonine-protein kinase HT1-like (LOC104598642), mRNA	sp|Q2MHE4|HT1_ARATH/1.2e-52/Serine/threonine-protein kinase HT1 OS=Arabidopsis thaliana GN=HT1 PE=1 SV=1	nnu:104606720/8.0e-83/uncharacterized LOC104606720; K15032 mTERF domain-containing protein, mitochondrial	At3g22750/5.7e-174/[T] KOG0192 Tyrosine kinase specific for activated (GTP-bound) p21cdc42Hs	PF02536/8.6E-29/mTERF	biological_process:GO:0018108//peptidyl-tyrosine phosphorylation;molecular_function:GO:0005524//ATP binding;GO:0004715//non-membrane spanning protein tyrosine kinase activity;
CL1271_Contig8_All	0	1.11	1.59	0.13	0	0	gi|225465339|ref|XP_002271842.1|/1.6e-69/PREDICTED: uncharacterized protein LOC100252260 [Vitis vinifera]	NA	NA	vvi:100252260/2.5e-70/uncharacterized LOC100252260; K15032 mTERF domain-containing protein, mitochondrial	At5g07900/3.2e-54/[KR] KOG1267 Mitochondrial transcription termination factor, mTERF	SM00733/1.3/Mitochondrial termination factor repeats	NA
CL12788_Contig5_All	0.4	10.1	49.39	15.68	39.87	8.49	gi|719963742|ref|XP_010250595.1|/0.0e+00/PREDICTED: auxin response factor 8 isoform X1 [Nelumbo nucifera] >gi|719963745|ref|XP_010250602.1| PREDICTED: auxin response factor 8 isoform X1 [Nelumbo nucifera]	gi|719963747|ref|XR_734453.1|/0/PREDICTED: Nelumbo nucifera auxin response factor 8 (LOC104592798), transcript variant X3, misc_RNA	sp|Q258Y5|ARFL_ORYSI/0.0e+00/Auxin response factor 12 OS=Oryza sativa subsp. indica GN=ARF12 PE=3 SV=1	sly:100191131/5.5e-179/auxin response factor 7; K14486 auxin response factor	At5g37020/7.0e-312/[TK] LSE0284 A Auxin response transcription factor	PS51745/22.009/PB1 domain profile.	biological_process:GO:0006355//regulation of transcription, DNA-templated;GO:0009734//auxin-activated signaling pathway;cellular_component:GO:0005634//nucleus;molecular_function:GO:0003677//DNA binding;
CL13441_Contig2_All	0.13	14.76	10.03	13.09	9.67	19.21	gi|720069796|ref|XP_010277540.1|/7.6e-83/PREDICTED: GATA transcription factor 24-like [Nelumbo nucifera]	NA	sp|Q8GXL7|GAT24_ARATH/2.1e-62/GATA transcription factor 24 OS=Arabidopsis thaliana GN=GATA24 PE=2 SV=2	pda:103702292/2.2e-10/protein FAR1-RELATED SEQUENCE 5-like; K17604 zinc finger SWIM domain-containing protein 3	At4g24470/7.2e-54/[K] KOG1601 GATA-4/5/6 transcription factors	PS00344/-/GATA-type zinc finger domain.	NA
CL13925_Contig1_All	0	15.02	13.1	28.91	8.18	8.34	gi|719973560|ref|XP_010241841.1|/5.2e-180/PREDICTED: zinc finger CCCH domain-containing protein 32-like [Nelumbo nucifera]	gi|802688563|ref|XM_012227302.1|/1.94172e-70/PREDICTED: Jatropha curcas zinc finger CCCH domain-containing protein 32 (LOC105642468), transcript variant X2, mRNA	sp|Q6NPN3|C3H58_ARATH/8.3e-136/Zinc finger CCCH domain-containing protein 58 OS=Arabidopsis thaliana GN=At5g18550 PE=2 SV=1	obr:102720157/4.2e-25/zinc finger CCCH domain-containing protein 43-like; K03260 translation initiation factor 4G	At5g18550/3.0e-132/[R] KOG1677 CCCH-type Zn-finger protein	PTHR12506:SF27/2.0E-223/--	NA
CL14565_Contig2_All	15.34	0.01	0	0.01	0.01	0	gi|720012696|ref|XP_010259946.1|/0.0e+00/PREDICTED: histone acetyltransferase HAC1-like [Nelumbo nucifera]	gi|720072553|ref|XM_010280109.1|/0/PREDICTED: Nelumbo nucifera histone acetyltransferase HAC1-like (LOC104612622), transcript variant X2, mRNA	sp|Q9C5X9|HAC1_ARATH/0.0e+00/Histone acetyltransferase HAC1 OS=Arabidopsis thaliana GN=HAC1 PE=1 SV=2	nnu:104599204/0.0e+00/histone acetyltransferase HAC1-like; K04498 E1A/CREB-binding protein [EC:2.3.1.48]	At1g79000/0.0e+00/[K] KOG1778 CREB binding protein/P300 and related TAZ Zn-finger proteins	SM00551/1.1E-35/TAZ zinc finger, present in p300 and CBP	NA
CL14811_Contig1_All	0.08	13.07	10.48	12.29	4	6.39	gi|720055161|ref|XP_010273289.1|/2.4e-227/PREDICTED: scarecrow-like protein 3 [Nelumbo nucifera]	NA	sp|Q9LPR8|SCL3_ARATH/5.2e-180/Scarecrow-like protein 3 OS=Arabidopsis thaliana GN=SCL3 PE=2 SV=1	cmo:103501517/7.0e-54/DELLA protein SLR1-like; K14494 DELLA protein	At1g50420/1.4e-179/[TK] LSE0487 A Gibberellin response modulator/Predicted transcription factor	PTHR31636:SF48/4.5E-269/--	biological_process:GO:0006355//regulation of transcription, DNA-templated;cellular_component:GO:0005634//nucleus;molecular_function:GO:0000989//transcription factor activity, transcription factor binding;
CL14833_Contig2_All	0	5.74	12.26	10.02	2.11	2.23	gi|695040599|ref|XP_009407884.1|/4.9e-84/PREDICTED: zinc finger CCCH domain-containing protein 31-like [Musa acuminata subsp. malaccensis]	gi|720031721|ref|XM_010267597.1|/3.02698e-36/PREDICTED: Nelumbo nucifera zinc finger CCCH domain-containing protein 14-like (LOC104603535), mRNA	sp|Q7XPK1|C3H31_ORYSJ/6.1e-77/Zinc finger CCCH domain-containing protein 31 OS=Oryza sativa subsp. japonica GN=Os04g0665700 PE=2 SV=1	gmx:102661410/2.1e-07/UTP--glucose-1-phosphate uridylyltransferase-like; K00963 UTP--glucose-1-phosphate uridylyltransferase [EC:2.7.7.9]	At3g12130/1.9e-48/[R] KOG1677 CCCH-type Zn-finger protein	PTHR10288/1.1E-96/--	molecular_function:GO:0005488//binding;
CL1515_Contig2_All	0	2.81	2.86	2.57	0.73	1.02	gi|719977199|ref|XP_010248777.1|/5.8e-72/PREDICTED: zinc finger CCCH domain-containing protein 67 isoform X1 [Nelumbo nucifera]	NA	sp|Q5RJC5|C3H67_ARATH/2.1e-48/Zinc finger CCCH domain-containing protein 67 OS=Arabidopsis thaliana GN=At5g63260 PE=2 SV=2	dosa:Os06t0520600-01/4.3e-27/Os06g0520600, ZINC_FINGER_CCCH_DOMAIN-CONTAINING_PROTEIN_43, C3H43; Similar to Zinc finger CCCH type domain containing protein ZFN-like 1.; K03260 translation initiation factor 4G	At5g63260/5.7e-48/[R] KOG1677 CCCH-type Zn-finger protein	PS50103/14.943/Zinc finger C3H1-type profile.	NA
CL15329_Contig1_All	0.09	19.09	16.81	9.57	5.06	3.35	gi|731414722|ref|XP_010659258.1|/6.4e-193/PREDICTED: zinc finger CCCH domain-containing protein 53 isoform X2 [Vitis vinifera]	gi|565469629|ref|XM_006292556.1|/1.47211e-53/Capsella rubella hypothetical protein (CARUB_v10018860mg) mRNA, complete cds	sp|Q0D3J9|C3H53_ORYSJ/3.9e-164/Zinc finger CCCH domain-containing protein 53 OS=Oryza sativa subsp. japonica GN=Os07g0682400 PE=2 SV=1	NA	At3g21100/1.6e-84/[RA] LSE0467 A Predicted RNA-binding protein, contains C3H1-type Zn-finger and RRM domains	SM00356/1.8E-4/zinc finger	molecular_function:GO:1901363//heterocyclic compound binding;GO:0097159//organic cyclic compound binding;
CL15614_Contig4_All	0	2.96	3.05	2.11	0.37	0.65	gi|658041397|ref|XP_008356307.1|/1.1e-38/PREDICTED: FHA domain-containing protein At4g14490-like [Malus domestica]	NA	sp|O23305|Y4449_ARATH/7.6e-27/FHA domain-containing protein At4g14490 OS=Arabidopsis thaliana GN=At4g14490 PE=1 SV=1	NA	NA	SM00240/4.0E-8/Forkhead associated domain	NA
CL17131_Contig2_All	0	0	2.11	3.32	0.73	0	gi|720045425|ref|XP_010270203.1|/9.7e-238/PREDICTED: transcriptional adapter ADA2-like isoform X3 [Nelumbo nucifera]	gi|719989732|ref|XM_010254440.1|/0/PREDICTED: Nelumbo nucifera transcriptional adapter ADA2 (LOC104594227), transcript variant X7, mRNA	sp|Q75LL6|TADA2_ORYSJ/8.0e-198/Transcriptional adapter ADA2 OS=Oryza sativa subsp. japonica GN=ADA2 PE=2 SV=2	nnu:104606608/6.8e-236/transcriptional adapter ADA2-like; K11314 transcriptional adapter 2-alpha	At3g07740/9.3e-145/[B] KOG0457 Histone acetyltransferase complex SAGA/ADA, subunit ADA2	PF00249/1.2E-12/Myb-like DNA-binding domain	NA
CL19002_Contig1_All	0.14	32.65	34.52	22.63	24.37	22.98	gi|719967212|ref|XP_010261163.1|/9.0e-94/PREDICTED: uncharacterized protein LOC104600053 [Nelumbo nucifera]	NA	NA	NA	At1g69030/3.9e-65/[RK] LSE0587 A Predicted transcription factor, contains BSD domain	PS50858/10.83/BSD domain profile.	NA
CL19727_Contig3_All	8.09	0	0	0	0	0.04	gi|769820580|ref|XP_011620741.1|/1.5e-93/PREDICTED: ethylene-responsive transcription factor WRI1 [Amborella trichopoda]	gi|743937201|ref|XM_011014701.1|/2.9405e-89/PREDICTED: Populus euphratica ethylene-responsive transcription factor WRI1-like (LOC105117139), mRNA	sp|Q6X5Y6|WRI1_ARATH/1.4e-84/Ethylene-responsive transcription factor WRI1 OS=Arabidopsis thaliana GN=WRI1 PE=2 SV=1	atr:18427038/2.3e-94/ethylene-responsive transcription factor WRI1; K09285 AP2-like factor, ANT lineage	At1g16060/2.8e-76/[K] LSE0337 A Ovule development protein/AP2 domain transcription factor	PF00847/2.1E-10/AP2 domain	NA
CL19910_Contig3_All	0.16	0	0.76	3.78	0.35	0	gi|448278892|gb|AGE44298.1|/1.4e-58/whirly transcription factor domain containing protein [Musa AB Group]	NA	sp|Q8VYF7|WHY2_ARATH/9.6e-53/Single-stranded DNA-binding protein WHY2, mitochondrial OS=Arabidopsis thaliana GN=WHY2 PE=1 SV=1	cvr:CHLNCDRAFT_134820/3.9e-16/hypothetical protein; K14573 nucleolar protein 4	NA	PTHR31745/3.4E-77/--	NA
CL20171_Contig1_All	4.94	0	0	0	0	0	gi|720029228|ref|XP_010265155.1|/2.3e-54/PREDICTED: ethylene-responsive transcription factor ERF118 [Nelumbo nucifera] >gi|720029231|ref|XP_010265156.1| PREDICTED: ethylene-responsive transcription factor ERF118 [Nelumbo nucifera] >gi|720029234|ref|XP_010265157.1| PREDICTED: ethylene-responsive transcription factor ERF118 [Nelumbo nucifera]	NA	sp|Q9CA27|EF118_ARATH/3.2e-22/Ethylene-responsive transcription factor ERF118 OS=Arabidopsis thaliana GN=ERF118 PE=2 SV=1	sot:102578223/1.4e-19/pathogenesis-related genes transcriptional activator PTI6; K13434 pathogenesis-related genes transcriptional activator PTI6	At1g68550/8.4e-22/[K] LSE0301 A AP2 domain transcription factor	PS51032/19.085/AP2/ERF domain profile.	NA
CL20458_Contig2_All	0	0.21	3.19	0.7	6.44	0.38	gi|720081797|ref|XP_010242395.1|/7.6e-214/PREDICTED: transcription factor bHLH13-like [Nelumbo nucifera] >gi|720081800|ref|XP_010242396.1| PREDICTED: transcription factor bHLH13-like [Nelumbo nucifera] >gi|720081803|ref|XP_010242397.1| PREDICTED: transcription factor bHLH13-like [Nelumbo nucifera] >gi|720081806|ref|XP_010242398.1| PREDICTED: transcription factor bHLH13-like [Nelumbo nucifera] >gi…	gi|985467366|ref|XM_006491230.2|/1.30495e-48/PREDICTED: Citrus sinensis transcription factor bHLH13 (LOC102626453), mRNA	sp|Q9LNJ5|BH013_ARATH/9.8e-135/Transcription factor bHLH13 OS=Arabidopsis thaliana GN=BHLH13 PE=2 SV=1	cam:101507137/2.7e-70/transcription factor MYC2-like; K13422 transcription factor MYC2	At1g01260/2.6e-134/[KT] LSE0107 A bHLH transcription factor	PS50888/16.374/Myc-type, basic helix-loop-helix (bHLH) domain profile.	NA
CL20827_Contig2_All	0.2	24.78	28.32	25.77	18.82	16.8	gi|720044955|ref|XP_010270053.1|/1.2e-192/PREDICTED: zinc finger CCCH domain-containing protein 12 isoform X1 [Nelumbo nucifera]	gi|720044954|ref|XM_010271751.1|/0/PREDICTED: Nelumbo nucifera zinc finger CCCH domain-containing protein 12 (LOC104606509), transcript variant X1, mRNA	sp|Q9SWF9|ZFNL_PEA/1.6e-97/Zinc finger CCCH domain-containing protein ZFN-like OS=Pisum sativum PE=2 SV=1	obr:102720157/1.8e-23/zinc finger CCCH domain-containing protein 43-like; K03260 translation initiation factor 4G	At1g04990/1.8e-95/[R] KOG1677 CCCH-type Zn-finger protein	SM00356/2.2E-6/zinc finger	NA
CL20884_Contig2_All	0	0.31	2.01	4.53	7.89	4.29	gi|720044568|ref|XP_010269930.1|/5.8e-105/PREDICTED: dnaJ homolog subfamily C member 2-like [Nelumbo nucifera] >gi|720044572|ref|XP_010269931.1| PREDICTED: dnaJ homolog subfamily C member 2-like [Nelumbo nucifera]	NA	NA	bna:106366899/1.4e-26/dnaJ homolog subfamily C member 2-like; K09522 DnaJ homolog subfamily C member 2	At5g45420/6.1e-75/[O] KOG0724 Zuotin and related molecular chaperones (DnaJ superfamily), contains DNA-binding domains	SM00717/1.8/SANT SWI3, ADA2, N-CoR and TFIIIB'' DNA-binding domains	cellular_component:GO:0016020//membrane;
CL20892_Contig3_All	0.06	12.86	24.81	26.98	27.46	10.1	gi|731379084|ref|XP_010660505.1|/1.3e-222/PREDICTED: trihelix transcription factor GTL1 isoform X2 [Vitis vinifera]	gi|719963849|ref|XM_010252588.1|/1.47654e-69/PREDICTED: Nelumbo nucifera trihelix transcription factor GTL1 (LOC104592987), transcript variant X2, mRNA	sp|Q9C882|GTL1_ARATH/1.4e-105/Trihelix transcription factor GTL1 OS=Arabidopsis thaliana GN=GTL1 PE=1 SV=2	bvg:104883960/3.7e-07/endochitinase-like; K01183 chitinase [EC:3.2.1.14]	At1g33240/1.7e-105/[K] KOG4282 Transcription factor GT-2 and related proteins, contains trihelix DNA-binding/SANT domain	PS50090/7.317/Myb-like domain profile.	NA
CL21065_Contig1_All	0.06	3.21	3.02	2.55	1.95	1.87	gi|720090838|ref|XP_010245233.1|/2.5e-186/PREDICTED: protein FAR1-RELATED SEQUENCE 5-like isoform X1 [Nelumbo nucifera] >gi|720090841|ref|XP_010245234.1| PREDICTED: protein FAR1-RELATED SEQUENCE 5-like isoform X1 [Nelumbo nucifera]	NA	sp|Q9SZL8|FRS5_ARATH/1.7e-113/Protein FAR1-RELATED SEQUENCE 5 OS=Arabidopsis thaliana GN=FRS5 PE=2 SV=1	pmum:103344202/3.4e-111/protein FAR1-RELATED SEQUENCE 5-like; K17604 zinc finger SWIM domain-containing protein 3	At4g38180/4.6e-113/[T] LSE0022 A FAR1 nuclear protein involved in phytochrome A signaling	PTHR31669/2.1E-240/--	NA
CL21157_Contig1_All	0.25	22.18	7.54	5.57	6.98	8.89	gi|225447109|ref|XP_002273680.1|/1.3e-112/PREDICTED: protein polybromo-1 [Vitis vinifera] >gi|359485509|ref|XP_003633285.1| PREDICTED: protein polybromo-1 [Vitis vinifera] >gi|731409521|ref|XP_010657227.1| PREDICTED: protein polybromo-1 [Vitis vinifera] >gi|297739198|emb|CBI28849.3| unnamed protein product [Vitis vinifera]	gi|955356000|ref|XM_006593402.2|/8.33951e-132/PREDICTED: Glycine max BAH and coiled-coil domain-containing protein 1-like (LOC100810424), transcript variant X1, mRNA	sp|B8AMA8|ALFL3_ORYSI/9.9e-07/PHD finger protein ALFIN-LIKE 3 OS=Oryza sativa subsp. indica GN=OsI_14081 PE=3 SV=2	mtr:MTR_5g097190/3.4e-25/DnaK family protein; K03283 heat shock 70kDa protein 1/8	At4g04260/1.7e-53/[K] KOG1886 BAH domain proteins	PTHR12505/1.9E-147/--	biological_process:GO:0006342//chromatin silencing;GO:0031507//heterochromatin assembly;cellular_component:GO:0000785//chromatin;GO:0005677//chromatin silencing complex;molecular_function:GO:0003682//chromatin binding;GO:0008270//zinc ion binding;GO:0000976//transcription regulatory region sequence-specific DNA binding;
CL21159_Contig1_All	0.21	6.14	7.29	5.93	2.61	2.4	gi|720047245|ref|XP_010270754.1|/4.4e-283/PREDICTED: zinc finger protein NUTCRACKER-like [Nelumbo nucifera] >gi|720047248|ref|XP_010270755.1| PREDICTED: zinc finger protein NUTCRACKER-like [Nelumbo nucifera] >gi|720047252|ref|XP_010270757.1| PREDICTED: zinc finger protein NUTCRACKER-like [Nelumbo nucifera]	gi|720047251|ref|XM_010272455.1|/0/PREDICTED: Nelumbo nucifera zinc finger protein NUTCRACKER-like (LOC104606980), transcript variant X3, mRNA	sp|Q700D2|JKD_ARATH/3.8e-91/Zinc finger protein JACKDAW OS=Arabidopsis thaliana GN=JKD PE=1 SV=1	tcc:TCM_029045/4.7e-96/Beta-galactosidase 17; K12309 beta-galactosidase [EC:3.2.1.23]	At2g02070/8.4e-138/[R] KOG1721 FOG: Zn-finger	SM00355/0.0052/zinc finger	cellular_component:GO:0016021//integral component of membrane;molecular_function:GO:0046872//metal ion binding;GO:0003676//nucleic acid binding;
CL21180_Contig1_All	0	0.17	0	1.1	0	2.44	gi|719986178|ref|XP_010251622.1|/0.0e+00/PREDICTED: protein FAR1-RELATED SEQUENCE 3 [Nelumbo nucifera] >gi|719986184|ref|XP_010251623.1| PREDICTED: protein FAR1-RELATED SEQUENCE 3 [Nelumbo nucifera]	gi|971575001|ref|XM_006361073.2|/0/PREDICTED: Solanum tuberosum protein FAR1-RELATED SEQUENCE 3 (LOC102589611), transcript variant X2, mRNA	sp|Q9ZVC9|FRS3_ARATH/1.6e-313/Protein FAR1-RELATED SEQUENCE 3 OS=Arabidopsis thaliana GN=FRS3 PE=2 SV=2	vra:106774920/5.9e-115/uncharacterized LOC106774920; K13963 serpin B	At2g27110/4.4e-313/[T] LSE0022 A FAR1 nuclear protein involved in phytochrome A signaling	PTHR31669:SF45/0.0/--	biological_process:GO:0006355//regulation of transcription, DNA-templated;cellular_component:GO:0009506//plasmodesma;molecular_function:GO:0008270//zinc ion binding;
CL21509_Contig1_All	0.56	92.23	84.84	38.45	33.74	17.4	gi|720004846|ref|XP_010257466.1|/4.9e-110/PREDICTED: zinc finger CCCH domain-containing protein 14 [Nelumbo nucifera]	gi|823226186|ref|XM_012590455.1|/4.85697e-35/PREDICTED: Gossypium raimondii zinc finger CCCH domain-containing protein 14-like (LOC105769677), mRNA	sp|Q7F8R0|C3H14_ORYSJ/4.7e-95/Zinc finger CCCH domain-containing protein 14 OS=Oryza sativa subsp. japonica GN=Os02g0194200 PE=2 SV=1	NA	At3g12130/4.8e-54/[R] KOG1677 CCCH-type Zn-finger protein	PS50103/12.042/Zinc finger C3H1-type profile.	molecular_function:GO:0003676//nucleic acid binding;
CL21782_Contig2_All	0.7	158.47	209.4	186.1	94.85	36.26	gi|21322711|emb|CAD22154.1|/1.0e-44/pherophorin-dz1 protein [Volvox carteri f. nagariensis]	NA	sp|P27484|GRP2_NICSY/7.0e-84/Glycine-rich protein 2 OS=Nicotiana sylvestris GN=GRP-2 PE=1 SV=1	aip:107619883/4.7e-34/formin-like protein 20; K02184 formin 2	At4g13340/1.2e-34/[M] LSE0601 A Pollen extensin-like protein (Pex)	SM00343/3.3E-5/zinc finger	NA
CL21796_Contig1_All	0	3.37	6.8	6.6	8.34	4.41	gi|731403355|ref|XP_010655028.1|/4.3e-91/PREDICTED: zinc finger CCCH domain-containing protein 16 isoform X1 [Vitis vinifera] >gi|731403357|ref|XP_010655029.1| PREDICTED: zinc finger CCCH domain-containing protein 16 isoform X1 [Vitis vinifera]	gi|778664072|ref|XM_011661910.1|/4.13773e-36/PREDICTED: Cucumis sativus zinc finger CCCH domain-containing protein 16 (LOC101205181), transcript variant X2, mRNA	sp|Q5Z807|C3H46_ORYSJ/5.2e-63/Zinc finger CCCH domain-containing protein 46 OS=Oryza sativa subsp. japonica GN=Os06g0704300 PE=2 SV=1	vvi:100243153/6.5e-92/zinc finger CCCH domain-containing protein 16; K14321 nucleoporin-like protein 2	NA	PS50103/15.375/Zinc finger C3H1-type profile.	NA
CL21993_Contig1_All	0.1	22.63	23.86	41.16	61.67	87.13	gi|947083885|gb|KRH32606.1|/1.6e-87/hypothetical protein GLYMA_10G063200 [Glycine max]	gi|828306635|ref|XM_004497503.2|/2.88004e-82/PREDICTED: Cicer arietinum uncharacterized LOC101495331 (LOC101495331), mRNA	NA	NA	At1g32700/5.1e-54/[R] LSE0429 A B-Box Zn-finger protein	PTHR31065/2.9E-112/--	cellular_component:GO:0005622//intracellular;molecular_function:GO:0008270//zinc ion binding;
CL22013_Contig4_All	0	14.9	5.95	3.87	3.15	8.99	gi|720015520|ref|XP_010260864.1|/7.5e-208/PREDICTED: zinc finger CCCH domain-containing protein 37 isoform X1 [Nelumbo nucifera]	gi|731434464|ref|XM_002269116.2|/6.48355e-110/PREDICTED: Vitis vinifera zinc finger CCCH domain-containing protein 37 (LOC100260359), transcript variant X2, mRNA	sp|Q941Q3|C3H37_ARATH/9.3e-140/Zinc finger CCCH domain-containing protein 37 OS=Arabidopsis thaliana GN=HUA1 PE=1 SV=1	dosa:Os06t0520600-01/1.9e-22/Os06g0520600, ZINC_FINGER_CCCH_DOMAIN-CONTAINING_PROTEIN_43, C3H43; Similar to Zinc finger CCCH type domain containing protein ZFN-like 1.; K03260 translation initiation factor 4G	At3g12680/3.5e-101/[R] KOG1677 CCCH-type Zn-finger protein	PS50103/13.263/Zinc finger C3H1-type profile.	NA
CL22013_Contig6_All	0	1.55	2.96	3.16	1.62	0.88	gi|720015520|ref|XP_010260864.1|/6.9e-156/PREDICTED: zinc finger CCCH domain-containing protein 37 isoform X1 [Nelumbo nucifera]	gi|657982368|ref|XM_008385001.1|/1.17972e-77/PREDICTED: Malus x domestica zinc finger CCCH domain-containing protein 37 (LOC103445948), mRNA	sp|Q941Q3|C3H37_ARATH/1.8e-98/Zinc finger CCCH domain-containing protein 37 OS=Arabidopsis thaliana GN=HUA1 PE=1 SV=1	osa:4341164/2.0e-22/OsC3H43; zinc finger CCCH domain-containing protein 43; K03260 translation initiation factor 4G	At3g12680/2.0e-59/[R] KOG1677 CCCH-type Zn-finger protein	PTHR12547:SF63/2.9E-156/--	molecular_function:GO:0005488//binding;
CL22672_Contig1_All	9.64	0	0	0	0	0	gi|595908215|ref|XP_007214218.1|/4.8e-201/hypothetical protein PRUPE_ppa023217mg [Prunus persica] >gi|462410083|gb|EMJ15417.1| hypothetical protein PRUPE_ppa023217mg [Prunus persica]	gi|568866290|ref|XM_006486427.1|/5.23936e-27/PREDICTED: Citrus sinensis protein FAR1-RELATED SEQUENCE 5-like (LOC102628463), mRNA	sp|Q9SWG3|FAR1_ARATH/3.7e-103/Protein FAR-RED IMPAIRED RESPONSE 1 OS=Arabidopsis thaliana GN=FAR1 PE=1 SV=1	vra:106773445/3.5e-156/protein FAR1-RELATED SEQUENCE 5-like; K17604 zinc finger SWIM domain-containing protein 3	At4g38180/2.7e-100/[T] LSE0022 A FAR1 nuclear protein involved in phytochrome A signaling	SM00575/6.6E-6/plant mutator transposase zinc finger	NA
CL22852_Contig1_All	0.34	130.01	104.16	221.33	217.53	177.37	gi|661893655|emb|CDP02096.1|/9.0e-79/unnamed protein product [Coffea canephora]	gi|1000960412|ref|XM_015720667.1|/1.43273e-88/PREDICTED: Ricinus communis myb-related protein 305 (LOC8281777), transcript variant X3, mRNA	sp|P81391|MYB05_ANTMA/2.1e-73/Myb-related protein 305 OS=Antirrhinum majus GN=MYB305 PE=2 SV=1	mdm:103404321/3.4e-78/myb-related protein 305-like; K09422 myb proto-oncogene protein, plant	At5g40350/6.1e-64/[K] KOG0048 Transcription factor, Myb superfamily	SM00717/1.5E-14/SANT SWI3, ADA2, N-CoR and TFIIIB'' DNA-binding domains	molecular_function:GO:0003677//DNA binding;
CL22853_Contig1_All	0	12.86	13.44	28.08	32.82	19.72	gi|800928711|gb|AKA88918.1|/9.4e-160/TCP2 [Aquilegia coerulea]	gi|800928710|gb|KP331539.1|/0/Aquilegia coerulea TCP2 mRNA, complete cds	sp|Q9FME3|TCP5_ARATH/1.8e-39/Transcription factor TCP5 OS=Arabidopsis thaliana GN=TCP5 PE=2 SV=1	NA	At5g60970/4.7e-39/[K] LSE0380 A Predicted bHLH transcription factor	PTHR31072/1.5E-119/--	NA
CL22944_Contig3_All	16.92	0	0	0.04	0	0.04	gi|700192350|gb|KGN47554.1|/1.8e-33/hypothetical protein Csa_6G358670 [Cucumis sativus]	NA	sp|Q9SZL8|FRS5_ARATH/2.6e-11/Protein FAR1-RELATED SEQUENCE 5 OS=Arabidopsis thaliana GN=FRS5 PE=2 SV=1	pxb:103959594/6.0e-10/ataxin-3 homolog; K11863 Ataxin-3 [EC:3.4.22.-]	At4g38180/7.0e-11/[T] LSE0022 A FAR1 nuclear protein involved in phytochrome A signaling	PF03101/2.5E-18/FAR1 DNA-binding domain	NA
CL23030_Contig2_All	0	17.01	22.46	6.01	10.68	4.07	gi|720025398|ref|XP_010263932.1|/1.5e-287/PREDICTED: tRNA-dihydrouridine(47) synthase [NAD(P)(+)]-like [Nelumbo nucifera]	gi|700256515|gb|KM399220.1|/0/Aquilegia coerulea FMN-linked oxidoreductases superfamily protein mRNA, partial cds	sp|Q7XT07|DUS3L_ORYSJ/1.5e-250/tRNA-dihydrouridine(47) synthase [NAD(P)(+)]-like OS=Oryza sativa subsp. japonica GN=Os04g0117600 PE=2 SV=2	nnu:104602061/2.2e-288/tRNA-dihydrouridine(47) synthase [NAD(P)(+)]-like; K05544 tRNA-dihydrouridine synthase 3 [EC:1.3.1.89]	At4g38890/5.8e-241/[R] KOG2333 Uncharacterized conserved protein	PF01207/5.1E-52/Dihydrouridine synthase (Dus)	biological_process:GO:0002943//tRNA dihydrouridine synthesis;GO:0055114//oxidation-reduction process;cellular_component:GO:0005829//cytosol;molecular_function:GO:0046872//metal ion binding;GO:0017150//tRNA dihydrouridine synthase activity;GO:0050660//flavin adenine dinucleotide binding;
CL23227_Contig3_All	0	4.56	2.09	2.18	3	3.31	gi|720092710|ref|XP_010245822.1|/1.7e-70/PREDICTED: zinc finger CCCH domain-containing protein 55 [Nelumbo nucifera]	NA	sp|Q6YYC0|C3H55_ORYSJ/4.3e-32/Zinc finger CCCH domain-containing protein 55 OS=Oryza sativa subsp. japonica GN=Os08g0135800 PE=2 SV=1	bdi:100842813/1.3e-14/zinc finger CCCH domain-containing protein 28-like; K14943 muscleblind	7292130/5.1e-16/[A] KOG1869 Splicing coactivator SRm160/300, subunit SRm300	PS50103/14.418/Zinc finger C3H1-type profile.	NA
CL23334_Contig2_All	0.13	12.39	7.43	9.32	1.45	3.31	gi|319718155|gb|ADV59379.1|/8.4e-114/GAGA-binding transcriptional activator [Aquilegia viridiflora]	gi|319718154|gb|FJ982296.1|/0/Aquilegia viridiflora GAGA-binding transcriptional activator (BBR/BPC2) mRNA, complete cds	sp|O82286|BPC7_ARATH/1.4e-50/Protein BASIC PENTACYSTEINE7 OS=Arabidopsis thaliana GN=BPC7 PE=1 SV=1	NA	At2g35550/3.7e-50/[K] LSE0462 A DNA-binding protein (GAGA-binding protein)	PTHR31421/6.1E-87/--	NA
CL2352_Contig2_All	0	20.8	18.85	13.5	15.06	16	gi|719973002|ref|XP_010279146.1|/5.4e-229/PREDICTED: uncharacterized protein LOC104613142 [Nelumbo nucifera]	gi|719973004|ref|XR_737895.1|/0/PREDICTED: Nelumbo nucifera uncharacterized LOC104613142 (LOC104613142), transcript variant X2, misc_RNA	sp|Q9LK73|U88A1_ARATH/4.7e-130/UDP-glycosyltransferase 88A1 OS=Arabidopsis thaliana GN=UGT88A1 PE=2 SV=1	nnu:104613142/8.3e-230/uncharacterized LOC104613142; K15032 mTERF domain-containing protein, mitochondrial	At4g02990/2.3e-192/[KR] KOG1267 Mitochondrial transcription termination factor, mTERF	PF02536/1.1E-105/mTERF	biological_process:GO:0042794//rRNA transcription from plastid promoter;GO:0006355//regulation of transcription, DNA-templated;GO:0008380//RNA splicing;GO:0009793//embryo development ending in seed dormancy;cellular_component:GO:0009536//plastid;GO:0005739//mitochondrion;molecular_function:GO:0003690//double-stranded DNA binding;
CL2352_Contig5_All	0	0	0	3.88	0	0.13	gi|719973002|ref|XP_010279146.1|/3.2e-228/PREDICTED: uncharacterized protein LOC104613142 [Nelumbo nucifera]	gi|719973004|ref|XR_737895.1|/0/PREDICTED: Nelumbo nucifera uncharacterized LOC104613142 (LOC104613142), transcript variant X2, misc_RNA	NA	nnu:104613142/4.9e-229/uncharacterized LOC104613142; K15032 mTERF domain-containing protein, mitochondrial	At4g02990/8.1e-192/[KR] KOG1267 Mitochondrial transcription termination factor, mTERF	SM00733/2.1E-4/Mitochondrial termination factor repeats	biological_process:GO:0042794//rRNA transcription from plastid promoter;GO:0006355//regulation of transcription, DNA-templated;GO:0008380//RNA splicing;GO:0009793//embryo development ending in seed dormancy;cellular_component:GO:0009536//plastid;GO:0005739//mitochondrion;molecular_function:GO:0003690//double-stranded DNA binding;
CL24075_Contig1_All	0.11	3.76	5.54	6.51	3.96	3.64	gi|719992672|ref|XP_010253648.1|/8.0e-298/PREDICTED: zinc finger CCCH domain-containing protein 24 isoform X1 [Nelumbo nucifera]	gi|731392610|ref|XM_002282278.3|/0/PREDICTED: Vitis vinifera zinc finger CCCH domain-containing protein 24 (LOC100262197), transcript variant X2, mRNA	sp|Q8L7S3|C3H24_ARATH/3.0e-194/Zinc finger CCCH domain-containing protein 24 OS=Arabidopsis thaliana GN=At2g28450 PE=1 SV=1	nnu:104594841/1.2e-298/zinc finger CCCH domain-containing protein 24; K15332 tRNA (uracil-5-)-methyltransferase [EC:2.1.1.-]	At2g28450_2/6.2e-170/[J] KOG2187 tRNA uracil-5-methyltransferase and related tRNA-modifying enzymes	PS51687/47.199/SAM-dependent methyltransferase RNA m(5)U-type domain profile.	NA
CL2463_Contig1_All	7.03	0	0	0	0	0	gi|720076951|ref|XP_010240878.1|/5.3e-158/PREDICTED: zinc finger CCCH domain-containing protein 56 isoform X1 [Nelumbo nucifera]	gi|672130275|ref|XM_008790444.1|/6.07e-118/PREDICTED: Phoenix dactylifera zinc finger CCCH domain-containing protein 56-like (LOC103706370), transcript variant X6, mRNA	sp|Q84UQ3|C3H56_ORYSJ/1.3e-114/Zinc finger CCCH domain-containing protein 56 OS=Oryza sativa subsp. japonica GN=Os08g0159800 PE=4 SV=1	mus:103984366/2.5e-11/zinc finger CCCH domain-containing protein 39-like; K15308 tristetraprolin	At1g32360_1/1.1e-88/[R] KOG1677 CCCH-type Zn-finger protein	PTHR12547:SF18/1.0E-107/--	molecular_function:GO:0046872//metal ion binding;
CL25013_Contig2_All	0	36.93	25.33	9.5	18.6	14.44	gi|800928628|gb|AKA88915.1|/2.2e-200/KXL4 [Aquilegia coerulea]	gi|800928627|gb|KP331536.1|/0/Aquilegia coerulea KXL4 mRNA, complete cds	sp|O04136|KNAP3_MALDO/1.4e-141/Homeobox protein knotted-1-like 3 OS=Malus domestica PE=2 SV=1	adu:107458758/4.6e-126/homeobox protein knotted-1-like 4; K15613 homeobox protein Meis1	At5g25220/3.2e-140/[K] KOG0773 Transcription factor MEIS1 and related HOX domain proteins	PF03790/1.8E-18/KNOX1 domain	NA
CL25169_Contig1_All	0	3.24	4.3	5.04	2.89	2.46	gi|720066507|ref|XP_010276543.1|/1.6e-180/PREDICTED: squamosa promoter-binding-like protein 1 [Nelumbo nucifera]	gi|985463848|ref|XM_006488684.2|/8.24862e-82/PREDICTED: Citrus sinensis squamosa promoter-binding-like protein 1 (LOC102617236), transcript variant X2, mRNA	sp|Q9SMX9|SPL1_ARATH/1.2e-125/Squamosa promoter-binding-like protein 1 OS=Arabidopsis thaliana GN=SPL1 PE=1 SV=2	mdm:103401427/9.3e-16/uncharacterized LOC103401427; K13415 protein brassinosteroid insensitive 1 [EC:2.7.10.1 2.7.11.1]	NA	PF03110/4.5E-29/SBP domain	cellular_component:GO:0016020//membrane;
CL25262_Contig2_All	39.8	0	0.03	0	0	0	gi|596034275|ref|XP_007219577.1|/8.9e-223/hypothetical protein PRUPE_ppa023263mg, partial [Prunus persica] >gi|462416039|gb|EMJ20776.1| hypothetical protein PRUPE_ppa023263mg, partial [Prunus persica]	gi|38230503|gb|AY442257.1|/4.37532e-99/Populus alba x Populus tremula clone cET-1-pop1-409 predicted protein mRNA, complete cds	sp|Q10M00|C3H22_ORYSJ/3.1e-157/Zinc finger CCCH domain-containing protein 22 OS=Oryza sativa subsp. japonica GN=Os03g0328900 PE=2 SV=2	atr:18436108/2.7e-06/nuclear pore complex protein NUP62; K14306 nuclear pore complex protein Nup62	SPBC3D6.14c/8.9e-10/[GO] KOG4157 beta-1,6-N-acetylglucosaminyltransferase, contains WSC domain	SM00356/2.0E-4/zinc finger	molecular_function:GO:1901363//heterocyclic compound binding;GO:0097159//organic cyclic compound binding;
CL25724_Contig1_All	0	0.15	0.3	0.49	8.68	12.16	gi|720015965|ref|XP_010261002.1|/1.3e-87/PREDICTED: ethylene-responsive transcription factor ABR1-like [Nelumbo nucifera]	gi|828293797|ref|XM_004489675.2|/8.72998e-53/PREDICTED: Cicer arietinum ethylene-responsive transcription factor ERF110-like (LOC101490540), mRNA	sp|Q9FGF8|ABR1_ARATH/5.5e-44/Ethylene-responsive transcription factor ABR1 OS=Arabidopsis thaliana GN=ABR1 PE=2 SV=1	ath:AT1G43160/8.7e-28/RAP2.6; ethylene-responsive transcription factor RAP2-6; K09286 EREBP-like factor	At5g64750/1.5e-43/[K] LSE0301 A AP2 domain transcription factor	PTHR31190/7.2E-58/--	NA
CL27218_Contig2_All	0	15.97	13.38	11.17	7.94	7.77	gi|720045316|ref|XP_010270167.1|/4.8e-173/PREDICTED: probable WRKY transcription factor 20 [Nelumbo nucifera]	gi|720045315|ref|XM_010271865.1|/1.80578e-140/PREDICTED: Nelumbo nucifera probable WRKY transcription factor 20 (LOC104606587), mRNA	sp|Q93WV0|WRK20_ARATH/1.0e-101/Probable WRKY transcription factor 20 OS=Arabidopsis thaliana GN=WRKY20 PE=2 SV=1	nnu:104605302/1.2e-94/probable WRKY transcription factor 34; K18835 WRKY transcription factor 2	At4g26640/1.1e-102/[KT] LSE0036 A WRKY superfamily transcription factors	PS50811/23.72/WRKY domain profile.	NA
CL27835_Contig1_All	0.04	36.03	45.72	9.07	2.58	2.05	gi|731414722|ref|XP_010659258.1|/9.6e-232/PREDICTED: zinc finger CCCH domain-containing protein 53 isoform X2 [Vitis vinifera]	gi|955342315|ref|XR_416095.2|/8.73825e-91/PREDICTED: Glycine max zinc finger CCCH domain-containing protein 53-like (LOC100804623), transcript variant X3, misc_RNA	sp|Q0D3J9|C3H53_ORYSJ/6.1e-168/Zinc finger CCCH domain-containing protein 53 OS=Oryza sativa subsp. japonica GN=Os07g0682400 PE=2 SV=1	NA	At3g21100/2.8e-95/[RA] LSE0467 A Predicted RNA-binding protein, contains C3H1-type Zn-finger and RRM domains	PS50103/14.821/Zinc finger C3H1-type profile.	NA
CL28019_Contig1_All	0.49	115.92	119.45	71.62	94.44	105.1	gi|949173072|gb|ALM95519.1|/1.9e-121/SEPALLATA-like protein 3 [Nigella damascena]	gi|929558510|gb|KT630789.1|/0/Thalictrum thalictroides clone 1 SEPALATA-3 mRNA, complete cds	sp|Q03489|AGL9_PETHY/7.9e-105/Agamous-like MADS-box protein AGL9 homolog OS=Petunia hybrida GN=FBP2 PE=1 SV=2	mus:103996658/5.6e-97/agamous-like MADS-box protein AGL9 homolog; K09260 MADS-box transcription enhancer factor 2A	At1g24260/5.9e-91/[K] KOG0014 MADS box transcription factor	PS50066/33.515/MADS-box domain profile.	biological_process:GO:0006355//regulation of transcription, DNA-templated;cellular_component:GO:0005634//nucleus;molecular_function:GO:0003677//DNA binding;GO:0003700//transcription factor activity, sequence-specific DNA binding;GO:0046983//protein dimerization activity;
CL28198_Contig1_All	0	2.36	29.62	1.7	33.75	3.91	gi|326523669|dbj|BAJ93005.1|/7.5e-78/predicted protein [Hordeum vulgare subsp. vulgare]	NA	sp|P27484|GRP2_NICSY/2.4e-66/Glycine-rich protein 2 OS=Nicotiana sylvestris GN=GRP-2 PE=1 SV=1	vvi:100259081/7.4e-78/glycine-rich protein 2-like; K09250 cellular nucleic acid-binding protein	At4g13340/1.7e-26/[M] LSE0601 A Pollen extensin-like protein (Pex)	PS50158/10.807/Zinc finger CCHC-type profile.	molecular_function:GO:0005488//binding;
CL2821_Contig1_All	0.09	18.89	11.06	15.22	24.16	9.33	gi|720003143|ref|XP_010256894.1|/3.9e-301/PREDICTED: scarecrow-like protein 9 [Nelumbo nucifera] >gi|720003146|ref|XP_010256895.1| PREDICTED: scarecrow-like protein 9 [Nelumbo nucifera]	gi|922373352|ref|XM_003606625.2|/1.09323e-29/Medicago truncatula GRAS family transcription factor mRNA	sp|Q9XE58|SCL14_ARATH/2.5e-197/Scarecrow-like protein 14 OS=Arabidopsis thaliana GN=SCL14 PE=2 SV=2	cit:102608614/1.8e-48/DELLA protein GAI; K14494 DELLA protein	At1g07530/6.6e-197/[TK] LSE0487 A Gibberellin response modulator/Predicted transcription factor	PS50985/70.239/GRAS family profile.	biological_process:GO:0006351//transcription, DNA-templated;
CL28658_Contig1_All	0.16	21.15	20.87	20.01	19.56	18.74	gi|719972968|ref|XP_010279061.1|/2.7e-124/PREDICTED: BSD domain-containing protein 1-like [Nelumbo nucifera]	gi|802793610|ref|XM_012236914.1|/8.22159e-39/PREDICTED: Jatropha curcas BSD domain-containing protein 1 (LOC105650042), mRNA	NA	bna:106400448/8.5e-06/H/ACA ribonucleoprotein complex non-core subunit NAF1; K14763 H/ACA ribonucleoprotein complex non-core subunit NAF1	At1g03350/3.2e-74/[S] KOG2690 Uncharacterized conserved protein, contains BSD domain	PS50858/14.299/BSD domain profile.	NA
CL29236_Contig8_All	0	0	0	1.46	0	0	gi|720046635|ref|XP_010270566.1|/2.4e-139/PREDICTED: SWI/SNF complex subunit SWI3B isoform X2 [Nelumbo nucifera]	gi|848875569|ref|XM_012982798.1|/2.4763e-39/PREDICTED: Erythranthe guttatus SWI/SNF complex subunit SWI3B (LOC105958795), partial mRNA	sp|Q84JG2|SWI3B_ARATH/3.3e-110/SWI/SNF complex subunit SWI3B OS=Arabidopsis thaliana GN=SWI3B PE=1 SV=1	nnu:104606859/2.0e-138/SWI/SNF complex subunit SWI3B; K11649 SWI/SNF related-matrix-associated actin-dependent regulator of chromatin subfamily C	At2g33610/2.9e-97/[B] KOG1279 Chromatin remodeling factor subunit and related transcription factors	SM00717/1.0E-13/SANT SWI3, ADA2, N-CoR and TFIIIB'' DNA-binding domains	NA
CL2971_Contig3_All	0	0.99	1.16	4.06	5.31	0.86	gi|661891940|emb|CDP04166.1|/1.1e-51/unnamed protein product [Coffea canephora]	gi|731435088|ref|XM_010646996.1|/2.34562e-18/PREDICTED: Vitis vinifera AP2-like ethylene-responsive transcription factor ANT (LOC100257805), transcript variant X2, mRNA	sp|Q5YGP7|PLET2_ARATH/1.9e-51/AP2-like ethylene-responsive transcription factor PLT2 OS=Arabidopsis thaliana GN=PLT2 PE=2 SV=1	rcu:8274244/1.0e-51/AP2-like ethylene-responsive transcription factor BBM2; K09285 AP2-like factor, ANT lineage	At1g51190/2.8e-49/[K] LSE0337 A Ovule development protein/AP2 domain transcription factor	PS51032/10.507/AP2/ERF domain profile.	NA
CL3057_Contig3_All	0	0.62	0	0	0.1	1.19	gi|719969714|ref|XP_010269220.1|/2.4e-67/PREDICTED: B3 domain-containing protein At3g19184-like [Nelumbo nucifera]	NA	sp|Q1G3M3|Y3918_ARATH/8.6e-63/B3 domain-containing protein At3g19184 OS=Arabidopsis thaliana GN=At3g19184 PE=2 SV=1	NA	At3g19180_2/9.0e-59/[S] LSE0155 A Uncharacterized protein	SM01019/1.6E-25/B3 DNA binding domain	biological_process:GO:0006351//transcription, DNA-templated;
CL3499_Contig4_All	0	0.94	0.44	0.13	0.41	0.54	gi|743870476|ref|XP_011033588.1|/7.5e-85/PREDICTED: uncharacterized protein LOC105132030 [Populus euphratica]	gi|927682185|gb|KR559021.1|/1.46362e-37/Heuchera parviflora var. saurensis voucher Folk 97 (OS), complete genome	NA	gra:105791428/2.5e-85/uncharacterized LOC105791428; K15032 mTERF domain-containing protein, mitochondrial	At5g07900/1.9e-72/[KR] KOG1267 Mitochondrial transcription termination factor, mTERF	PTHR13068/2.5E-130/--	NA
CL365_Contig4_All	0.51	46.63	92.01	118.92	167.15	85.03	gi|719969881|ref|XP_010269709.1|/1.5e-294/PREDICTED: zeaxanthin epoxidase, chloroplastic [Nelumbo nucifera]	gi|831436718|gb|KM405432.1|/0/Paeonia ostii zeaxanthin epoxidase (ZEP1) mRNA, partial cds	sp|P93236|ABA2_SOLLC/6.1e-286/Zeaxanthin epoxidase, chloroplastic OS=Solanum lycopersicum PE=2 SV=1	nnu:104606289/2.3e-295/zeaxanthin epoxidase, chloroplastic; K09838 zeaxanthin epoxidase [EC:1.14.13.90]	At5g67030/7.3e-262/[CR] KOG2614 Kynurenine 3-monooxygenase and related flavoprotein monooxygenases	PTHR13789/8.4E-230/--	biological_process:GO:0055114//oxidation-reduction process;GO:0009688//abscisic acid biosynthetic process;cellular_component:GO:0016020//membrane;GO:0009507//chloroplast;molecular_function:GO:0052663//antheraxanthin epoxidase activity;GO:0009540//zeaxanthin epoxidase [overall] activity;GO:0052662//zeaxanthin epoxidase activity;GO:0071949//FAD binding;
CL4351_Contig3_All	0.06	11.59	33.83	15.3	16.19	27.58	gi|590633253|ref|XP_007028065.1|/0.0e+00/White-brown-complex ABC transporter family isoform 2 [Theobroma cacao] >gi|508716670|gb|EOY08567.1| White-brown-complex ABC transporter family isoform 2 [Theobroma cacao]	gi|719975640|ref|XM_010249788.1|/0/PREDICTED: Nelumbo nucifera ABC transporter G family member 22 (LOC104591010), transcript variant X2, mRNA	sp|Q93YS4|AB22G_ARATH/7.6e-298/ABC transporter G family member 22 OS=Arabidopsis thaliana GN=ABCG22 PE=1 SV=1	bpg:Bathy04g00870/1.3e-12/protein DEK; K17046 protein DEK	At5g06530/3.0e-245/[Q] KOG0061 Transporter, ABC superfamily (Breast cancer resistance protein)	PTHR36886/2.5E-32/--	biological_process:GO:0055085//transmembrane transport;cellular_component:GO:0016021//integral component of membrane;GO:0005886//plasma membrane;molecular_function:GO:0005524//ATP binding;GO:0042626//ATPase activity, coupled to transmembrane movement of substances;
CL5122_Contig2_All	0	13.14	12.53	9.99	9.58	9.51	gi|719988465|ref|XP_010252341.1|/1.7e-153/PREDICTED: transcription factor bHLH3 [Nelumbo nucifera] >gi|719988468|ref|XP_010252342.1| PREDICTED: transcription factor bHLH3 [Nelumbo nucifera]	gi|778681030|ref|XM_011653141.1|/5.02348e-66/PREDICTED: Cucumis sativus transcription factor bHLH3 (LOC101219851), mRNA	sp|O23487|BH003_ARATH/1.8e-113/Transcription factor bHLH3 OS=Arabidopsis thaliana GN=BHLH3 PE=2 SV=1	gra:105789352/4.6e-58/transcription factor MYC4-like; K13422 transcription factor MYC2	At4g16430/4.9e-113/[KT] LSE0107 A bHLH transcription factor	PF00010/1.3E-10/Helix-loop-helix DNA-binding domain	NA
CL5683_Contig1_All	0	7.86	6.43	6.28	3.07	4.58	gi|719983464|ref|XP_010250771.1|/0.0e+00/PREDICTED: uncharacterized protein LOC104592923 isoform X1 [Nelumbo nucifera]	gi|719983466|ref|XM_010252470.1|/0/PREDICTED: Nelumbo nucifera uncharacterized LOC104592923 (LOC104592923), transcript variant X2, mRNA	sp|O80450|TGT3B_ARATH/2.1e-10/Trihelix transcription factor GT-3b OS=Arabidopsis thaliana GN=GT-3B PE=1 SV=1	pop:POPTR_0010s11650g/1.7e-06/POPTRDRAFT_231714; hypothetical protein; K13148 integrator complex subunit 11 [EC:3.1.27.-]	At5g63420/1.7e-229/[A] KOG1137 mRNA cleavage and polyadenylation factor II complex, BRR5 (CPSF subunit)	PS51029/8.778/MADF domain profile.	NA
CL5720_Contig2_All	0	4.2	0.11	3.29	2.39	16	gi|720028449|ref|XP_010264912.1|/4.1e-123/PREDICTED: protein PHR1-LIKE 1 isoform X2 [Nelumbo nucifera]	gi|720020762|ref|XM_010264207.1|/2.913e-93/PREDICTED: Nelumbo nucifera protein PHR1-LIKE 1-like (LOC104601025), mRNA	sp|Q8GUN5|PHL1_ARATH/4.5e-67/Protein PHR1-LIKE 1 OS=Arabidopsis thaliana GN=PHL1 PE=1 SV=1	mus:103984394/2.2e-28/uncharacterized protein LOC103984394; K14317 nuclear pore complex protein Nup214	At4g28610/1.5e-69/[RK] LSE0452 A MYB transcription factor	PF14379/2.6E-23/MYB-CC type transfactor, LHEQLE motif	NA
CL5786_Contig1_All	0	33.87	28.61	21.51	21.6	9.9	gi|719986610|ref|XP_010251750.1|/9.0e-267/PREDICTED: dnaJ homolog subfamily C member 2-like [Nelumbo nucifera]	gi|922384000|ref|XM_013606767.1|/5.80832e-171/Medicago truncatula DnaJ domain-containing protein mRNA	sp|Q6XL73|DNJ39_ARATH/5.3e-07/Chaperone protein dnaJ 39 OS=Arabidopsis thaliana GN=ATJ39 PE=2 SV=2	nnu:104593549/1.4e-267/dnaJ homolog subfamily C member 2-like; K09522 DnaJ homolog subfamily C member 2	At3g11450/6.8e-227/[O] KOG0724 Zuotin and related molecular chaperones (DnaJ superfamily), contains DNA-binding domains	PS51293/6.184/SANT domain profile.	cellular_component:GO:0005634//nucleus;molecular_function:GO:0003677//DNA binding;
CL5800_Contig4_All	17.27	0	0	0	0	0	gi|720046728|ref|XP_010270590.1|/0.0e+00/PREDICTED: protein FAR1-RELATED SEQUENCE 5-like [Nelumbo nucifera]	gi|733346907|gb|KJ064907.1|/8.31666e-16/Sesamum indicum clone TilSSR_36108 microsatellite Sesame_36108 sequence	sp|Q9SZL8|FRS5_ARATH/1.2e-273/Protein FAR1-RELATED SEQUENCE 5 OS=Arabidopsis thaliana GN=FRS5 PE=2 SV=1	vra:106774920/1.7e-117/uncharacterized LOC106774920; K13963 serpin B	At4g38180/3.2e-273/[T] LSE0022 A FAR1 nuclear protein involved in phytochrome A signaling	PF10551/1.2E-21/MULE transposase domain	biological_process:GO:0006355//regulation of transcription, DNA-templated;molecular_function:GO:0008270//zinc ion binding;
CL5861_Contig4_All	0	9.36	3.66	1.09	0.83	0.75	gi|731387756|ref|XP_010649367.1|/7.1e-215/PREDICTED: scarecrow-like protein 1 [Vitis vinifera] >gi|731387758|ref|XP_010649368.1| PREDICTED: scarecrow-like protein 1 [Vitis vinifera] >gi|731387760|ref|XP_010649369.1| PREDICTED: scarecrow-like protein 1 [Vitis vinifera]	gi|802559296|ref|XM_012210717.1|/7.05646e-130/PREDICTED: Jatropha curcas scarecrow-like protein 1 (LOC105629176), transcript variant X3, mRNA	sp|Q9SDQ3|SCL1_ARATH/2.0e-175/Scarecrow-like protein 1 OS=Arabidopsis thaliana GN=SCL1 PE=2 SV=1	cam:101514454/8.0e-78/scarecrow-like protein 8; K14777 ATP-dependent RNA helicase DDX47/RRP3 [EC:3.6.4.13]	At1g21450/5.3e-175/[TK] LSE0487 A Gibberellin response modulator/Predicted transcription factor	PF03514/7.2E-135/GRAS domain family	biological_process:GO:0006355//regulation of transcription, DNA-templated;cellular_component:GO:0005634//nucleus;molecular_function:GO:0043565//sequence-specific DNA binding;GO:0003700//transcription factor activity, sequence-specific DNA binding;
CL5921_Contig3_All	0	0.86	0.38	0.17	0	0.33	gi|720072458|ref|XP_010278377.1|/2.6e-144/PREDICTED: B3 domain-containing protein Os07g0563300-like [Nelumbo nucifera]	gi|731437277|ref|XM_010647861.1|/2.31625e-119/PREDICTED: Vitis vinifera B3 domain-containing protein Os07g0563300 (LOC100253361), transcript variant X2, mRNA	sp|Q0D5G4|Y7633_ORYSJ/4.0e-114/B3 domain-containing protein Os07g0563300 OS=Oryza sativa subsp. japonica GN=Os07g0563300 PE=3 SV=2	sita:101780026/5.3e-12/AP2/ERF and B3 domain-containing protein Os01g0141000; K09287 RAV-like factor	At4g32010/9.4e-62/[TK] LSE0285 A APETALA2 and related transcription factors	PTHR23336/1.2E-162/--	NA
CL6028_Contig6_All	26.93	0	0	0	0	0	gi|567867977|ref|XP_006426611.1|/1.1e-132/hypothetical protein CICLE_v10026319mg [Citrus clementina] >gi|557528601|gb|ESR39851.1| hypothetical protein CICLE_v10026319mg [Citrus clementina]	gi|720019030|ref|XM_010263679.1|/0/PREDICTED: Nelumbo nucifera PHD finger protein ALFIN-LIKE 4 (LOC104600621), transcript variant X2, mRNA	sp|O81488|ALFL4_ARATH/5.6e-119/PHD finger protein ALFIN-LIKE 4 OS=Arabidopsis thaliana GN=AL4 PE=1 SV=2	apro:F751_1589/1.1e-07/Lysine-specific demethylase 5B; K11446 histone demethylase JARID1 [EC:1.14.11.-]	At5g26210/1.5e-118/[R] KOG1632 Uncharacterized PHD Zn-finger protein	PF12165/1.9E-66/Domain of unknown function (DUF3594)	biological_process:GO:0006355//regulation of transcription, DNA-templated;cellular_component:GO:0016021//integral component of membrane;molecular_function:GO:0042393//histone binding;GO:0008270//zinc ion binding;
CL6250_Contig2_All	0	0.06	1.66	3.67	0	0.48	gi|720006149|ref|XP_010257887.1|/3.2e-248/PREDICTED: kanadaptin [Nelumbo nucifera]	gi|823126317|ref|XM_012632766.1|/2.67364e-169/PREDICTED: Gossypium raimondii kanadaptin (LOC105801476), transcript variant X1, mRNA	sp|Q9SX31|PERK9_ARATH/3.4e-06/Proline-rich receptor-like protein kinase PERK9 OS=Arabidopsis thaliana GN=PERK9 PE=2 SV=1	mus:103980753/4.2e-19/nuclear inhibitor of protein phosphatase 1-like; K13216 nuclear inhibitor of protein phosphatase 1 [EC:3.1.4.-]	At5g38840/5.9e-207/[R] KOG1881 Anion exchanger adaptor protein Kanadaptin, contains FHA domain	PTHR23308:SF2/2.8E-218/--	NA
CL6705_Contig1_All	0	4.99	1.34	0.47	7.48	5.57	gi|720045316|ref|XP_010270167.1|/1.4e-85/PREDICTED: probable WRKY transcription factor 20 [Nelumbo nucifera]	gi|955338029|ref|XM_014779425.1|/6.25644e-27/PREDICTED: Glycine max probable WRKY transcription factor 20 (LOC100127383), transcript variant X4, mRNA	sp|Q93WV0|WRK20_ARATH/1.0e-70/Probable WRKY transcription factor 20 OS=Arabidopsis thaliana GN=WRKY20 PE=2 SV=1	vvi:100256306/7.6e-73/WRKY transcription factor 1-like; K18834 WRKY transcription factor 1	At4g26640/2.7e-70/[KT] LSE0036 A WRKY superfamily transcription factors	PTHR31221/1.8E-105/--	NA
CL741_Contig1_All	0	3.17	0	0.89	0.07	0	gi|720019525|ref|XP_010262113.1|/7.0e-140/PREDICTED: zinc finger CCCH domain-containing protein 64 isoform X1 [Nelumbo nucifera]	NA	sp|Q84WU9|C3H64_ARATH/1.2e-118/Zinc finger CCCH domain-containing protein 64 OS=Arabidopsis thaliana GN=At5g56900 PE=2 SV=1	NA	At5g56900/3.3e-118/[S] KOG2476 Uncharacterized conserved protein	PS50103/12.718/Zinc finger C3H1-type profile.	NA
CL7507_Contig2_All	3.38	823.71	794.28	683.63	701.64	479.95	gi|333952841|gb|AEG25810.1|/1.1e-103/PISTILLATA-like protein [Adonis vernalis]	gi|333952840|gb|HQ694801.1|/0/Adonis vernalis PISTILLATA-like protein (PI-1) mRNA, partial cds	sp|Q07474|MADS2_PETHY/8.4e-70/Floral homeotic protein PMADS 2 OS=Petunia hybrida GN=PMADS2 PE=2 SV=1	vvi:100232978/1.5e-73/MADS9, PI, PISTILLATA; PISTILLATA-like MADS-box protein-like; K09264 MADS-box transcription factor, plant	At5g20240/3.0e-58/[K] KOG0014 MADS box transcription factor	PTHR11945:SF97/2.5E-115/--	NA
CL7813_Contig4_All	0.2	12.55	8.03	7.98	3.55	8.29	gi|720033028|ref|XP_010266300.1|/0.0e+00/PREDICTED: protein FAR1-RELATED SEQUENCE 5-like [Nelumbo nucifera]	gi|720033027|ref|XM_010267998.1|/0/PREDICTED: Nelumbo nucifera protein FAR1-RELATED SEQUENCE 5-like (LOC104603834), mRNA	sp|Q9SZL8|FRS5_ARATH/4.6e-294/Protein FAR1-RELATED SEQUENCE 5 OS=Arabidopsis thaliana GN=FRS5 PE=2 SV=1	vra:106774920/3.1e-119/uncharacterized LOC106774920; K13963 serpin B	At4g38180/1.2e-293/[T] LSE0022 A FAR1 nuclear protein involved in phytochrome A signaling	PF10551/1.2E-22/MULE transposase domain	biological_process:GO:0006355//regulation of transcription, DNA-templated;molecular_function:GO:0008270//zinc ion binding;
CL8180_Contig4_All	0	0	0.75	1.73	3.61	2.27	gi|719990039|ref|XP_010252839.1|/8.0e-164/PREDICTED: nuclear inhibitor of protein phosphatase 1-like [Nelumbo nucifera]	NA	sp|Q8W4D8|DDL_ARATH/3.0e-07/FHA domain-containing protein DDL OS=Arabidopsis thaliana GN=DDL PE=1 SV=1	nnu:104594298/1.2e-164/nuclear inhibitor of protein phosphatase 1-like; K13216 nuclear inhibitor of protein phosphatase 1 [EC:3.1.4.-]	At5g47790/9.7e-122/[R] KOG1880 Nuclear inhibitor of phosphatase-1	PF00498/8.2E-18/FHA domain	NA
CL8283_Contig3_All	0.06	5.77	4.53	16.85	15.16	25.75	gi|697146912|ref|XP_009627608.1|/3.4e-78/PREDICTED: uncharacterized protein LOC104118131 [Nicotiana tomentosiformis]	gi|694310994|ref|XM_009357406.1|/2.68334e-62/PREDICTED: Pyrus x bretschneideri transcription factor bHLH49-like (LOC103946646), mRNA	sp|Q9CAA9|BH049_ARATH/6.2e-54/Transcription factor bHLH49 OS=Arabidopsis thaliana GN=BHLH49 PE=1 SV=1	gra:105799904/2.2e-13/GTP-binding protein SAR1-like; K07953 GTP-binding protein SAR1 [EC:3.6.5.-]	At1g68920/1.6e-53/[KT] LSE0107 A bHLH transcription factor	PTHR12565/5.8E-93/--	NA
CL887_Contig9_All	0	4.06	3	3.35	2.35	1.47	gi|731342304|ref|XP_010682332.1|/6.9e-132/PREDICTED: cyclin-D-binding Myb-like transcription factor 1 isoform X2 [Beta vulgaris subsp. vulgaris]	gi|663673456|emb|HG975450.1|/9.93774e-31/Solanum pennellii chromosome ch11, complete genome	sp|Q9S7G7|MB3R1_ARATH/5.6e-07/Myb-related protein 3R-1 OS=Arabidopsis thaliana GN=MYB3R-1 PE=2 SV=1	bvg:104891849/5.8e-14/glutamic acid-rich protein; K17046 protein DEK	At5g41020/5.7e-115/[K] KOG0051 RNA polymerase I termination factor, Myb superfamily	PS50090/6.632/Myb-like domain profile.	NA
CL9174_Contig2_All	0	0.41	2.58	0	0.4	0	gi|720068974|ref|XP_010277289.1|/1.3e-221/PREDICTED: protein FAR1-RELATED SEQUENCE 4-like [Nelumbo nucifera] >gi|720068977|ref|XP_010277290.1| PREDICTED: protein FAR1-RELATED SEQUENCE 4-like [Nelumbo nucifera] >gi|720068980|ref|XP_010277291.1| PREDICTED: protein FAR1-RELATED SEQUENCE 4-like [Nelumbo nucifera] >gi|720068983|ref|XP_010277292.1| PREDICTED: protein FAR1-RELATED SEQUENCE 4-like [Nelum…	NA	sp|Q6NQJ7|FRS4_ARATH/8.3e-129/Protein FAR1-RELATED SEQUENCE 4 OS=Arabidopsis thaliana GN=FRS4 PE=2 SV=2	vvi:100249256/1.7e-128/protein FAR1-RELATED SEQUENCE 8; K17604 zinc finger SWIM domain-containing protein 3	At1g76320/2.2e-128/[T] LSE0022 A FAR1 nuclear protein involved in phytochrome A signaling	PF10551/6.4E-25/MULE transposase domain	NA
CL9175_Contig1_All	0	1.83	1.2	1.01	0	0.58	gi|719998308|ref|XP_010255371.1|/3.4e-31/PREDICTED: beta-amylase 2, chloroplastic-like isoform X1 [Nelumbo nucifera]	gi|823150758|ref|XM_012619753.1|/1.17554e-30/PREDICTED: Gossypium raimondii beta-amylase 7 (LOC105791606), transcript variant X7, mRNA	sp|O80831|BAM7_ARATH/1.4e-30/Beta-amylase 7 OS=Arabidopsis thaliana GN=BAM7 PE=2 SV=2	nnu:104596060/5.1e-32/beta-amylase 7-like; K01177 beta-amylase [EC:3.2.1.2]	At2g45880/3.6e-30/[G] LSE0409 A Beta-amylase	PTHR31352/5.5E-56/--	biological_process:GO:0000272//polysaccharide catabolic process;molecular_function:GO:0016161//beta-amylase activity;
CL980_Contig1_All	0	6.2	6.29	5.97	8.72	7.8	gi|720010733|ref|XP_010259340.1|/0.0e+00/PREDICTED: calmodulin-binding transcription activator 5 isoform X2 [Nelumbo nucifera]	gi|720038579|ref|XM_010269722.1|/9.92743e-165/PREDICTED: Nelumbo nucifera calmodulin-binding transcription activator 5-like (LOC104605104), transcript variant X3, mRNA	sp|O23463|CMTA5_ARATH/7.0e-278/Calmodulin-binding transcription activator 5 OS=Arabidopsis thaliana GN=CMTA5 PE=2 SV=2	apro:F751_6987/9.8e-24/Triacylglycerol lipase SDP1; K14674 TAG lipase / steryl ester hydrolase / phospholipase A2 / LPA acyltransferase [EC:3.1.1.3 3.1.1.13 3.1.1.4 2.3.1.51]	At4g16150/2.9e-209/[S] KOG0520 Uncharacterized conserved protein, contains IPT/TIG domain	PS50096/9.432/IQ motif profile.	NA
Unigene10552_All	0	7.79	5.77	3.67	4.13	3.64	gi|719996779|ref|XP_010254885.1|/2.4e-213/PREDICTED: SWI/SNF complex subunit SWI3D isoform X2 [Nelumbo nucifera]	gi|719996778|ref|XM_010256583.1|/1.5669e-158/PREDICTED: Nelumbo nucifera SWI/SNF complex subunit SWI3D (LOC104595723), transcript variant X2, mRNA	sp|Q8VY05|SWI3D_ARATH/6.3e-156/SWI/SNF complex subunit SWI3D OS=Arabidopsis thaliana GN=SWI3D PE=1 SV=3	nnu:104595723/2.3e-213/SWI/SNF complex subunit SWI3D; K11649 SWI/SNF related-matrix-associated actin-dependent regulator of chromatin subfamily C	At4g34430/2.2e-115/[B] KOG1279 Chromatin remodeling factor subunit and related transcription factors	SM00717/1.2E-12/SANT SWI3, ADA2, N-CoR and TFIIIB'' DNA-binding domains	NA
Unigene10622_All	0	3.79	3.59	1.99	2.68	2.25	gi|720011427|ref|XP_010259560.1|/0.0e+00/PREDICTED: zinc finger CCCH domain-containing protein 31 isoform X1 [Nelumbo nucifera]	gi|720011426|ref|XM_010261258.1|/0/PREDICTED: Nelumbo nucifera zinc finger CCCH domain-containing protein 31 (LOC104598950), transcript variant X1, mRNA	sp|O22243|C3H31_ARATH/0.0e+00/Zinc finger CCCH domain-containing protein 31 OS=Arabidopsis thaliana GN=At2g47680 PE=2 SV=2	egr:104426762/0.0e+00/zinc finger CCCH domain-containing protein 31-like; K18995 ATP-dependent RNA helicase DHX29 [EC:3.6.4.13]	At2g47680/0.0e+00/[A] KOG0920 ATP-dependent RNA helicase A	SM00490/1.6E-10/helicase superfamily c-terminal domain	NA
Unigene10640_All	0.06	19.41	15.45	11.76	9.97	11.03	gi|720093832|ref|XP_010246174.1|/9.6e-236/PREDICTED: LOW QUALITY PROTEIN: probable RNA polymerase II transcription factor B subunit 1-1 [Nelumbo nucifera]	NA	sp|Q3ECP0|TFB1A_ARATH/2.1e-180/Probable RNA polymerase II transcription factor B subunit 1-1 OS=Arabidopsis thaliana GN=TFB1-1 PE=2 SV=1	nnu:104589524/1.5e-236/probable RNA polymerase II transcription factor B subunit 1-1; K03141 transcription initiation factor TFIIH subunit 1	At1g55750/1.5e-156/[KL] KOG2074 RNA polymerase II transcription initiation/nucleotide excision repair factor TFIIH, subunit TFB1	PS50858/9.745/BSD domain profile.	NA
Unigene11040_All	0	25.93	26.42	10	9.99	5.15	gi|719971851|ref|XP_010275842.1|/1.7e-64/PREDICTED: mediator-associated protein 1-like [Nelumbo nucifera]	NA	sp|Q9SB42|MDA1_ARATH/3.9e-30/Mediator-associated protein 1 OS=Arabidopsis thaliana GN=At4g25210 PE=1 SV=1	brp:103871689/2.2e-11/nucleolin 1-like; K11294 nucleolin	CE24463/4.3e-12/[B] KOG1911 Heterochromatin-associated protein HP1 and related CHROMO domain proteins	PF04504/1.3E-26/Protein of unknown function, DUF573	NA
Unigene115587_All	4.08	0	0	0	0	0	gi|502121993|ref|XP_004497526.1|/2.2e-48/PREDICTED: transcription factor TCP11 [Cicer arietinum]	gi|567213426|ref|XM_006410814.1|/2.06391e-17/Eutrema salsugineum hypothetical protein (EUTSA_v10017929mg) mRNA, complete cds	sp|Q9SJK7|TCP11_ARATH/2.1e-33/Transcription factor TCP11 OS=Arabidopsis thaliana GN=TCP11 PE=2 SV=1	brp:103855775/7.4e-25/transcription factor TCP21; K16221 transcription factor TCP21 (protein CCA1 HIKING EXPEDITION)	At2g37000/5.6e-33/[K] LSE0380 A Predicted bHLH transcription factor	PTHR31072:SF25/1.4E-59/--	NA
Unigene120745_All	3.22	0	0	0	0	0	gi|719969237|ref|XP_010267832.1|/0.0e+00/PREDICTED: calmodulin-binding transcription activator 3-like [Nelumbo nucifera] >gi|719969240|ref|XP_010267840.1| PREDICTED: calmodulin-binding transcription activator 3-like [Nelumbo nucifera]	gi|720042538|ref|XM_010270969.1|/0/PREDICTED: Nelumbo nucifera calmodulin-binding transcription activator 3-like (LOC104605988), transcript variant X3, mRNA	sp|Q6NPP4|CMTA2_ARATH/4.4e-278/Calmodulin-binding transcription activator 2 OS=Arabidopsis thaliana GN=CMTA2 PE=1 SV=1	apro:F751_6987/8.6e-26/Triacylglycerol lipase SDP1; K14674 TAG lipase / steryl ester hydrolase / phospholipase A2 / LPA acyltransferase [EC:3.1.1.3 3.1.1.13 3.1.1.4 2.3.1.51]	At5g64220/3.1e-209/[S] KOG0520 Uncharacterized conserved protein, contains IPT/TIG domain	PTHR23335:SF12/0.0/--	biological_process:GO:0098542//defense response to other organism;
Unigene1319_All	0	29.28	30.9	25.43	44.77	53.78	gi|719975909|ref|XP_010248356.1|/6.0e-134/PREDICTED: uncharacterized protein LOC104591249 [Nelumbo nucifera]	gi|802570448|ref|XM_012212794.1|/2.09419e-59/PREDICTED: Jatropha curcas uncharacterized LOC105630818 (LOC105630818), mRNA	NA	NA	At3g49800/1.8e-90/[RK] LSE0587 A Predicted transcription factor, contains BSD domain	PTHR31923:SF4/4.8E-183/--	NA
Unigene14690_All	0	44.21	37.37	23.54	23.63	16.84	gi|719971851|ref|XP_010275842.1|/1.4e-63/PREDICTED: mediator-associated protein 1-like [Nelumbo nucifera]	NA	sp|Q9SB42|MDA1_ARATH/1.1e-29/Mediator-associated protein 1 OS=Arabidopsis thaliana GN=At4g25210 PE=1 SV=1	sot:102593685/2.0e-09/uncharacterized LOC102593685; K14826 FK506-binding nuclear protein [EC:5.2.1.8]	At1g11510/1.3e-32/[RK] LSE0488 A Predicted DNA-binding transcription factor	PF04504/1.4E-29/Protein of unknown function, DUF573	NA
Unigene158802_All	16.65	0	0	0	0	0	gi|225442479|ref|XP_002283785.1|/1.7e-124/PREDICTED: uncharacterized protein LOC100241227 [Vitis vinifera] >gi|297743200|emb|CBI36067.3| unnamed protein product [Vitis vinifera]	gi|573915872|ref|XM_006645524.1|/2.38067e-43/PREDICTED: Oryza brachyantha transcription factor MYB1R1-like (LOC102719634), mRNA	sp|Q2V9B0|MY1R1_SOLTU/4.5e-35/Transcription factor MYB1R1 OS=Solanum tuberosum PE=2 SV=1	cre:CHLREDRAFT_165812/1.1e-22/hypothetical protein; K08869 aarF domain-containing kinase	At3g16350/6.0e-87/[K] LSE0160 A Myb family transcription factor	PTHR24078:SF169/3.3E-100/--	biological_process:GO:0006351//transcription, DNA-templated;GO:0009723//response to ethylene;
Unigene16860_All	0.11	61.42	31.17	16.11	17.03	21.68	gi|720051696|ref|XP_010272169.1|/8.9e-91/PREDICTED: transcription factor bHLH79-like isoform X2 [Nelumbo nucifera]	gi|731425947|ref|XM_002267597.2|/9.9069e-92/PREDICTED: Vitis vinifera transcription factor bHLH79 (LOC100256975), mRNA	sp|Q9LV17|BH079_ARATH/2.2e-55/Transcription factor bHLH79 OS=Arabidopsis thaliana GN=BHLH79 PE=2 SV=1	csv:101205993/1.7e-14/transcription factor PIF5-like; K16189 phytochrome-interacting factor 4	At1g59640/2.0e-55/[KT] LSE0107 A bHLH transcription factor	PTHR12565:SF143/4.7E-98/--	NA
Unigene17863_All	0	6.61	8.09	8.17	13	7.32	gi|719970921|ref|XP_010272682.1|/4.2e-230/PREDICTED: protein SHORT-ROOT-like [Nelumbo nucifera]	gi|719970920|ref|XM_010274380.1|/1.76921e-145/PREDICTED: Nelumbo nucifera protein SHORT-ROOT-like (LOC104608404), mRNA	sp|Q9SZF7|SHR_ARATH/1.3e-181/Protein SHORT-ROOT OS=Arabidopsis thaliana GN=SHR PE=1 SV=1	tcc:TCM_010965/7.0e-44/GRAS family transcription factor family protein; K14494 DELLA protein	At4g37650/3.5e-181/[TK] LSE0487 A Gibberellin response modulator/Predicted transcription factor	PS50985/51.009/GRAS family profile.	NA
Unigene21123_All	0.26	25.53	22.53	27.67	59.63	61.72	gi|719999704|ref|XP_010255803.1|/4.2e-143/PREDICTED: LOW QUALITY PROTEIN: BSD domain-containing protein 1-like [Nelumbo nucifera]	gi|823148102|ref|XM_012618507.1|/4.80824e-26/PREDICTED: Gossypium raimondii BSD domain-containing protein 1-like (LOC105790758), mRNA	sp|B0Z5H1|YCF2_OENPA/5.2e-06/Protein Ycf2 OS=Oenothera parviflora GN=ycf2-A PE=3 SV=1	sot:102597735/9.6e-07/protein DEK-like; K17046 protein DEK	At1g03350/3.5e-78/[S] KOG2690 Uncharacterized conserved protein, contains BSD domain	SM00751/4.9E-10/domain in transcription factors and synapse-associated proteins	NA
Unigene21336_All	0	0	7.41	8.83	8.92	1.91	gi|720006230|ref|XP_010257913.1|/6.0e-78/PREDICTED: transcription factor BIM2 isoform X2 [Nelumbo nucifera]	gi|769812339|ref|XM_011624941.1|/4.43438e-29/PREDICTED: Amborella trichopoda transcription factor BIM2 (LOC18433937), mRNA	sp|Q9CAA4|BIM2_ARATH/1.2e-52/Transcription factor BIM2 OS=Arabidopsis thaliana GN=BIM2 PE=1 SV=1	NA	At1g69010/3.2e-52/[KT] LSE0107 A bHLH transcription factor	PTHR12565/5.4E-78/--	NA
Unigene23887_All	0.06	35.3	25.36	27.25	25.29	21.7	gi|720077514|ref|XP_010241066.1|/1.5e-112/PREDICTED: uncharacterized protein LOC104585779 isoform X2 [Nelumbo nucifera]	gi|731378996|ref|XM_010662080.1|/2.52239e-25/PREDICTED: Vitis vinifera uncharacterized LOC104877280 (LOC104877280), mRNA	sp|Q94F58|NAC89_ARATH/4.5e-43/NAC domain-containing protein 89 OS=Arabidopsis thaliana GN=NAC089 PE=1 SV=1	bna:106383523/6.7e-25/NAC domain-containing protein 89-like; K12581 CCR4-NOT transcription complex subunit 7/8	At1g33060/3.2e-72/[S] LSE0117 A No apical meristem (NAM) developmental protein and related proteins	PTHR31989:SF5/5.8E-100/--	NA
Unigene24320_All	0.09	19.89	19.29	36.06	34.23	27.15	gi|720004286|ref|XP_010257277.1|/5.3e-164/PREDICTED: E3 ubiquitin-protein ligase makorin isoform X1 [Nelumbo nucifera]	gi|720004294|ref|XM_010258978.1|/2.96781e-137/PREDICTED: Nelumbo nucifera E3 ubiquitin-protein ligase makorin (LOC104597447), transcript variant X4, mRNA	sp|Q5ZA07|C3H41_ORYSJ/1.2e-145/E3 ubiquitin-protein ligase makorin OS=Oryza sativa subsp. japonica GN=MKRN PE=2 SV=1	nnu:104597447/8.1e-165/E3 ubiquitin-protein ligase makorin; K15687 E3 ubiquitin-protein ligase makorin [EC:2.3.2.27]	Hs7305273/3.6e-64/[O] KOG1039 Predicted E3 ubiquitin ligase	PF13639/2.2E-8/Ring finger domain	molecular_function:GO:0008270//zinc ion binding;
Unigene24373_All	0	11.11	11	11.04	17.33	12.17	gi|720090738|ref|XP_010245198.1|/1.3e-149/PREDICTED: heat stress transcription factor A-1 [Nelumbo nucifera]	gi|351722666|ref|NM_001249811.1|/1.1302e-117/Glycine max heat shock factor protein hsf8-related (LOC732544), mRNA &gt;gi|42415864|gb|AY458843.1| Glycine max heat shock factor protein hsf8-related mRNA, complete cds	sp|Q84T61|HSFA1_ORYSJ/1.7e-123/Heat stress transcription factor A-1 OS=Oryza sativa subsp. japonica GN=HSFA1 PE=2 SV=1	nnu:104588809/2.0e-150/heat stress transcription factor A-1; K09419 heat shock transcription factor, other eukaryote	At1g32330/9.7e-110/[K] KOG0627 Heat shock transcription factor	SM00415/3.8E-63/heat shock factor	NA
Unigene26999_All	0.34	59.15	59	71.72	72.45	52.8	gi|719964895|ref|XP_010254782.1|/2.8e-102/PREDICTED: LIM domain-containing protein WLIM1-like [Nelumbo nucifera]	gi|802652512|ref|XM_012224733.1|/1.17844e-125/PREDICTED: Jatropha curcas LIM domain-containing protein WLIM1-like (LOC105640426), mRNA	sp|P29675|SF3_HELAN/8.9e-70/Pollen-specific protein SF3 OS=Helianthus annuus GN=SF3 PE=2 SV=1	jcu:105640426/2.5e-98/LIM domain-containing protein WLIM1-like; K09377 cysteine and glycine-rich protein	At1g10200/2.5e-79/[TZ] KOG1700 Regulatory protein MLP and related LIM proteins	PTHR24206/1.6E-126/--	molecular_function:GO:0008270//zinc ion binding;
Unigene27067_All	0	30.48	43.34	122.06	44.81	29.82	gi|720054818|ref|XP_010273176.1|/3.1e-91/PREDICTED: LIM domain-containing protein PLIM2c [Nelumbo nucifera]	gi|743875601|ref|XM_010909065.1|/7.48861e-101/PREDICTED: Elaeis guineensis LIM domain-containing protein WLIM2b-like (LOC105034045), mRNA	sp|P29675|SF3_HELAN/7.0e-57/Pollen-specific protein SF3 OS=Helianthus annuus GN=SF3 PE=2 SV=1	vvi:100267125/5.8e-90/pollen-specific protein SF3-like; K09377 cysteine and glycine-rich protein	At2g39900/2.6e-82/[TZ] KOG1700 Regulatory protein MLP and related LIM proteins	SM00132/5.7E-14/Zinc-binding domain present in Lin-11, Isl-1, Mec-3.	molecular_function:GO:0008270//zinc ion binding;
Unigene27250_All	0.26	87.63	106.18	61.28	57.9	59.69	gi|720027599|ref|XP_010264625.1|/7.6e-123/PREDICTED: PHD finger protein ALFIN-LIKE 1-like [Nelumbo nucifera]	gi|723728778|ref|XM_004246712.2|/1.7447e-123/PREDICTED: Solanum lycopersicum PHD finger protein ALFIN-LIKE 1 (LOC101251316), mRNA	sp|Q9SRM4|ALFL2_ARATH/4.0e-106/PHD finger protein ALFIN-LIKE 2 OS=Arabidopsis thaliana GN=AL2 PE=1 SV=1	NA	At3g11200/1.1e-105/[R] KOG1632 Uncharacterized PHD Zn-finger protein	SM00249/3.1E-10/PHD zinc finger	NA
Unigene27263_All	0.25	29.63	38.54	26.21	25.47	21.63	gi|225439426|ref|XP_002265093.1|/1.1e-108/PREDICTED: PHD finger protein ALFIN-LIKE 1 [Vitis vinifera]	NA	sp|Q9SRM4|ALFL2_ARATH/2.5e-103/PHD finger protein ALFIN-LIKE 2 OS=Arabidopsis thaliana GN=AL2 PE=1 SV=1	apro:F751_1589/1.2e-06/Lysine-specific demethylase 5B; K11446 histone demethylase JARID1 [EC:1.14.11.-]	At3g11200/6.7e-103/[R] KOG1632 Uncharacterized PHD Zn-finger protein	PTHR12321:SF46/2.5E-160/--	biological_process:GO:0006355//regulation of transcription, DNA-templated;molecular_function:GO:0042393//histone binding;GO:0008270//zinc ion binding;
Unigene27365_All	0.27	64.83	40.49	37.45	25.64	31.42	gi|720074340|ref|XP_010278986.1|/0.0e+00/PREDICTED: zinc finger CCCH domain-containing protein 30-like [Nelumbo nucifera]	gi|727448707|ref|XM_010507688.1|/6.15947e-97/PREDICTED: Camelina sativa zinc finger CCCH domain-containing protein 30-like (LOC104782682), mRNA	sp|P93755|C3H30_ARATH/1.8e-251/Zinc finger CCCH domain-containing protein 30 OS=Arabidopsis thaliana GN=At2g41900 PE=1 SV=2	apro:F751_1912/1.5e-29/D-tyrosyl-tRNA(Tyr) deacylase; K07560 D-tyrosyl-tRNA(Tyr) deacylase [EC:3.1.-.-]	At2g41900/3.7e-251/[R] KOG1595 CCCH-type Zn-finger protein	PTHR14493/0.0/--	molecular_function:GO:0046872//metal ion binding;
Unigene27591_All	0.06	8.61	8.39	6.1	4.57	3.85	gi|720065518|ref|XP_010276293.1|/0.0e+00/PREDICTED: protein FAR1-RELATED SEQUENCE 11 isoform X1 [Nelumbo nucifera]	gi|731411346|ref|XM_010659642.1|/0/PREDICTED: Vitis vinifera protein FAR1-RELATED SEQUENCE 11 (LOC100250520), transcript variant X2, mRNA	sp|Q9SY66|FRS11_ARATH/0.0e+00/Protein FAR1-RELATED SEQUENCE 11 OS=Arabidopsis thaliana GN=FRS11 PE=2 SV=1	pmum:103344202/3.3e-72/protein FAR1-RELATED SEQUENCE 5-like; K17604 zinc finger SWIM domain-containing protein 3	At1g10240/0.0e+00/[T] LSE0022 A FAR1 nuclear protein involved in phytochrome A signaling	PS50966/9.545/Zinc finger SWIM-type profile.	biological_process:GO:0006355//regulation of transcription, DNA-templated;molecular_function:GO:0008270//zinc ion binding;
Unigene30102_All	0.19	16.7	13.69	23.38	36.28	20.62	gi|731431893|ref|XP_010644097.1|/9.0e-153/PREDICTED: BES1/BZR1 homolog protein 4 [Vitis vinifera]	gi|922394694|ref|XM_003596227.2|/3.97332e-81/Medicago truncatula brassinazole-resistant 1 protein partial mRNA	sp|Q9ZV88|BEH4_ARATH/3.7e-128/BES1/BZR1 homolog protein 4 OS=Arabidopsis thaliana GN=BEH4 PE=1 SV=1	nnu:104595761/2.6e-72/BES1/BZR1 homolog protein 2; K14503 brassinosteroid resistant 1/2	At1g78700/9.7e-128/[GR] LSE0468 A Predicted glycosylhydrolase	PF05687/1.1E-65/BES1/BZR1 plant transcription factor, N-terminal	biological_process:GO:0006355//regulation of transcription, DNA-templated;GO:0009742//brassinosteroid mediated signaling pathway;molecular_function:GO:0003700//transcription factor activity, sequence-specific DNA binding;
Unigene30299_All	0	10.15	9.2	1.9	0.21	0.83	gi|922395461|ref|XP_003589274.2|/8.6e-42/plant-specific B3-DNA-binding domain protein [Medicago truncatula] >gi|657401035|gb|AES59525.2| plant-specific B3-DNA-binding domain protein [Medicago truncatula]	NA	sp|Q8RYD1|REM16_ARATH/2.9e-27/B3 domain-containing protein REM16 OS=Arabidopsis thaliana GN=REM16 PE=2 SV=1	NA	At3g18990/4.8e-13/[S] LSE0155 A Uncharacterized protein	PF02362/6.2E-13/B3 DNA binding domain	NA
Unigene30350_All	0	0.53	2.48	1.43	0.17	0	gi|720024059|ref|XP_010263522.1|/7.2e-63/PREDICTED: transcription factor HEC1-like [Nelumbo nucifera]	gi|971537379|ref|XM_006339879.2|/5.49658e-57/PREDICTED: Solanum tuberosum transcription factor HEC1 (LOC102579254), mRNA	sp|Q9FHA7|HEC1_ARATH/1.9e-45/Transcription factor HEC1 OS=Arabidopsis thaliana GN=HEC1 PE=1 SV=1	thj:104816650/3.2e-15/transcription factor bHLH140; K10863 aprataxin [EC:3.-.-.-]	At5g67060/5.0e-45/[KT] LSE0107 A bHLH transcription factor	PTHR12565:SF74/1.5E-83/--	NA
Unigene33543_All	0	4.07	5.55	5.77	4.88	3.97	gi|720074710|ref|XP_010279103.1|/4.1e-77/PREDICTED: transcription factor bHLH30-like [Nelumbo nucifera]	NA	sp|Q9S7Y1|BH030_ARATH/2.8e-39/Transcription factor bHLH30 OS=Arabidopsis thaliana GN=BHLH30 PE=1 SV=1	rcu:8288847/1.1e-10/transcription factor MYC2; K13422 transcription factor MYC2	At1g68810/7.3e-39/[KT] LSE0107 A bHLH transcription factor	SM00353/2.2E-13/helix loop helix domain	molecular_function:GO:0005488//binding;
Unigene33739_All	0.27	77.04	75.32	49.03	59.76	44.92	gi|658000888|ref|XP_008392902.1|/1.5e-96/PREDICTED: pollen-specific protein SF3-like isoform X1 [Malus domestica] >gi|658000890|ref|XP_008392903.1| PREDICTED: pollen-specific protein SF3-like isoform X1 [Malus domestica] >gi|694320380|ref|XP_009351060.1| PREDICTED: pollen-specific protein SF3 isoform X1 [Pyrus x bretschneideri]	gi|802547000|ref|XM_012232623.1|/2.66884e-151/PREDICTED: Jatropha curcas LIM domain-containing protein WLIM2b (LOC105646705), transcript variant X1, mRNA	sp|P29675|SF3_HELAN/4.7e-56/Pollen-specific protein SF3 OS=Helianthus annuus GN=SF3 PE=2 SV=1	mdm:103455087/2.3e-97/pollen-specific protein SF3-like; K09377 cysteine and glycine-rich protein	At3g55770/5.1e-89/[TZ] KOG1700 Regulatory protein MLP and related LIM proteins	PS50023/13.325/LIM domain profile.	molecular_function:GO:0008270//zinc ion binding;
Unigene36682_All	0.14	0.32	1.2	1.78	1.51	3.17	gi|720021754|ref|XP_010262826.1|/1.3e-92/PREDICTED: zinc finger CCCH domain-containing protein 25 isoform X1 [Nelumbo nucifera] >gi|720021757|ref|XP_010262828.1| PREDICTED: zinc finger CCCH domain-containing protein 25 isoform X1 [Nelumbo nucifera]	gi|731391883|ref|XM_010652613.1|/3.75148e-95/PREDICTED: Vitis vinifera zinc finger CCCH domain-containing protein 25 (LOC100246760), transcript variant X2, mRNA &gt;gi|731391885|ref|XM_010652614.1| PREDICTED: Vitis vinifera zinc finger CCCH domain-containing protein 25 (LOC100246760), transcript variant X3, mRNA	sp|Q10B98|C3H25_ORYSJ/1.2e-86/Zinc finger CCCH domain-containing protein 25 OS=Oryza sativa subsp. japonica GN=Os03g0826400 PE=2 SV=1	nnu:104601247/2.0e-93/zinc finger CCCH domain-containing protein 25; K13107 RNA-binding motif protein, X-linked 2	At3g47120/1.1e-80/[R] KOG0126 Predicted RNA-binding protein (RRM superfamily)	PS50102/19.041/Eukaryotic RNA Recognition Motif (RRM) profile.	molecular_function:GO:1901363//heterocyclic compound binding;GO:0097159//organic cyclic compound binding;
Unigene4202_All	0.05	9.81	4.28	2.4	4.36	4.48	gi|719973945|ref|XP_010243574.1|/4.1e-163/PREDICTED: splicing factor U2af small subunit B-like [Nelumbo nucifera] >gi|719973949|ref|XP_010243584.1| PREDICTED: splicing factor U2af small subunit B-like [Nelumbo nucifera]	gi|731345368|ref|XR_790795.1|/6.1435e-137/PREDICTED: Beta vulgaris subsp. vulgaris splicing factor U2af small subunit B-like (LOC104898494), transcript variant X3, misc_RNA	sp|Q9S709|U2AFA_ARATH/1.4e-116/Splicing factor U2af small subunit A OS=Arabidopsis thaliana GN=U2AF35A PE=2 SV=1	nnu:104587598/6.3e-164/splicing factor U2af small subunit B-like; K12836 splicing factor U2AF 35 kDa subunit	At1g27650/3.7e-116/[A] KOG2202 U2 snRNP splicing factor, small subunit, and related proteins	PR01848/4.31E-63/U2 auxiliary factor small subunit signature	biological_process:GO:0000398//mRNA splicing, via spliceosome;cellular_component:GO:0089701//U2AF;molecular_function:GO:0003723//RNA binding;GO:0046872//metal ion binding;GO:0000166//nucleotide binding;
Unigene5277_All	0	0.58	5.45	3.12	1.37	4.17	gi|719973945|ref|XP_010243574.1|/5.2e-163/PREDICTED: splicing factor U2af small subunit B-like [Nelumbo nucifera] >gi|719973949|ref|XP_010243584.1| PREDICTED: splicing factor U2af small subunit B-like [Nelumbo nucifera]	gi|731345368|ref|XR_790795.1|/1.2756e-133/PREDICTED: Beta vulgaris subsp. vulgaris splicing factor U2af small subunit B-like (LOC104898494), transcript variant X3, misc_RNA	sp|Q9S709|U2AFA_ARATH/1.3e-116/Splicing factor U2af small subunit A OS=Arabidopsis thaliana GN=U2AF35A PE=2 SV=1	nnu:104587598/7.9e-164/splicing factor U2af small subunit B-like; K12836 splicing factor U2AF 35 kDa subunit	At1g27650/3.5e-116/[A] KOG2202 U2 snRNP splicing factor, small subunit, and related proteins	PF00076/1.1E-6/RNA recognition motif. (a.k.a. RRM, RBD, or RNP domain)	biological_process:GO:0000398//mRNA splicing, via spliceosome;cellular_component:GO:0089701//U2AF;molecular_function:GO:0003723//RNA binding;GO:0046872//metal ion binding;GO:0000166//nucleotide binding;
Unigene7086_All	0.56	180.33	270.71	154.21	250.26	169.99	gi|949173052|gb|ALM95509.1|/5.0e-106/AGAMOUS-like protein 6 [Nigella damascena]	gi|421958005|gb|JX680248.1|/1.68711e-169/Aquilegia coerulea MADS-box protein AGL6 mRNA, complete cds	sp|Q6EU39|MADS6_ORYSJ/9.1e-82/MADS-box transcription factor 6 OS=Oryza sativa subsp. japonica GN=MADS6 PE=1 SV=1	vvi:100232868/8.7e-87/MADS3; MADS-box protein 3; K09264 MADS-box transcription factor, plant	At2g45650/2.1e-72/[K] KOG0014 MADS box transcription factor	PS50066/33.726/MADS-box domain profile.	NA
Unigene7211_All	0.07	19.25	21.37	21.84	21.06	11.09	gi|719989251|ref|XP_010252578.1|/1.2e-146/PREDICTED: zinc finger CCCH domain-containing protein 3 [Nelumbo nucifera] >gi|719989253|ref|XP_010252579.1| PREDICTED: zinc finger CCCH domain-containing protein 3 [Nelumbo nucifera]	NA	sp|Q94AD9|C3H3_ARATH/4.4e-86/Zinc finger CCCH domain-containing protein 3 OS=Arabidopsis thaliana GN=At1g04990 PE=2 SV=1	dosa:Os06t0520600-01/3.2e-22/Os06g0520600, ZINC_FINGER_CCCH_DOMAIN-CONTAINING_PROTEIN_43, C3H43; Similar to Zinc finger CCCH type domain containing protein ZFN-like 1.; K03260 translation initiation factor 4G	At1g04990/5.8e-85/[R] KOG1677 CCCH-type Zn-finger protein	PTHR12506/3.1E-159/--	NA
Unigene7813_All	0	7.29	4.38	4.35	6.48	5.97	gi|719983173|ref|XP_010250675.1|/0.0e+00/PREDICTED: calmodulin-binding transcription activator 4-like isoform X1 [Nelumbo nucifera] >gi|719983176|ref|XP_010250676.1| PREDICTED: calmodulin-binding transcription activator 4-like isoform X1 [Nelumbo nucifera]	gi|764645717|ref|XM_011459191.1|/3.10529e-115/PREDICTED: Fragaria vesca subsp. vesca calmodulin-binding transcription activator 4 (LOC101306402), mRNA	sp|Q9FYG2|CMTA4_ARATH/1.6e-179/Calmodulin-binding transcription activator 4 OS=Arabidopsis thaliana GN=CMTA4 PE=1 SV=1	apro:F751_6987/6.4e-26/Triacylglycerol lipase SDP1; K14674 TAG lipase / steryl ester hydrolase / phospholipase A2 / LPA acyltransferase [EC:3.1.1.3 3.1.1.13 3.1.1.4 2.3.1.51]	At1g67310/4.2e-179/[S] KOG0520 Uncharacterized conserved protein, contains IPT/TIG domain	PTHR23335/0.0/--	NA
Unigene8129_All	0.08	15.31	13.02	11.94	16.92	10.23	gi|720064024|ref|XP_010275819.1|/1.2e-108/PREDICTED: probable WRKY transcription factor 32 isoform X1 [Nelumbo nucifera]	gi|567923235|ref|XM_006453561.1|/8.18202e-24/Citrus clementina hypothetical protein (CICLE_v10008135mg) mRNA, complete cds	sp|P59583|WRK32_ARATH/1.7e-65/Probable WRKY transcription factor 32 OS=Arabidopsis thaliana GN=WRKY32 PE=2 SV=1	egu:105038993/1.3e-56/probable WRKY transcription factor 2; K18835 WRKY transcription factor 2	At4g30930_1/6.0e-57/[KT] LSE0036 A WRKY superfamily transcription factors	PTHR31221:SF39/4.4E-95/--	NA
Unigene924_All	0.42	44.77	45.18	39.25	6.91	7.57	gi|971571649|ref|XP_015169749.1|/1.5e-26/PREDICTED: B3 domain-containing protein Os04g0386900-like [Solanum tuberosum]	gi|663673456|emb|HG975450.1|/6.23253e-12/Solanum pennellii chromosome ch11, complete genome	sp|Q7XLP4|Y4869_ORYSJ/7.0e-22/B3 domain-containing protein Os04g0386900 OS=Oryza sativa subsp. japonica GN=Os04g0386900 PE=2 SV=3	NA	NA	PTHR31391:SF15/1.9E-33/--	NA
Unigene935_All	0.13	21.25	27.46	20.42	11.53	9.8	gi|719965461|ref|XP_010256524.1|/1.3e-98/PREDICTED: single-stranded DNA-binding protein WHY1, chloroplastic-like [Nelumbo nucifera]	gi|731344130|ref|XM_010684944.1|/8.31564e-82/PREDICTED: Beta vulgaris subsp. vulgaris single-stranded DNA-binding protein WHY1, chloroplastic (LOC104897966), mRNA	sp|Q9LL85|WHY1_SOLTU/3.2e-92/Single-stranded DNA-binding protein WHY1, chloroplastic OS=Solanum tuberosum GN=WHY1 PE=1 SV=1	cvr:CHLNCDRAFT_134820/4.5e-24/hypothetical protein; K14573 nucleolar protein 4	NA	PTHR31745/6.4E-151/--	NA
Unigene94911_All	0	0	17.71	14.41	0	25.29	gi|720069796|ref|XP_010277540.1|/1.7e-67/PREDICTED: GATA transcription factor 24-like [Nelumbo nucifera]	gi|778724485|ref|XM_011660512.1|/6.15799e-30/PREDICTED: Cucumis sativus GATA transcription factor 24 (LOC101222542), transcript variant X3, mRNA	sp|Q8GXL7|GAT24_ARATH/3.5e-55/GATA transcription factor 24 OS=Arabidopsis thaliana GN=GATA24 PE=2 SV=2	nnu:104611721/1.4e-50/protein FAM32A; K13120 protein FAM32A	At4g24470/3.0e-45/[K] KOG1601 GATA-4/5/6 transcription factors	PF06203/9.6E-15/CCT motif	NA
Unigene978_All	0.67	21.38	23.07	139.37	74.66	82.37	gi|118485459|gb|ABK94586.1|/9.3e-94/unknown [Populus trichocarpa]	gi|731383839|ref|XM_002266463.2|/2.08313e-152/PREDICTED: Vitis vinifera LIM domain-containing protein WLIM1 (LOC100266902), mRNA	sp|P29675|SF3_HELAN/2.9e-77/Pollen-specific protein SF3 OS=Helianthus annuus GN=SF3 PE=2 SV=1	tcc:TCM_007239/6.6e-92/GATA type zinc finger transcription factor family protein; K09377 cysteine and glycine-rich protein	At1g10200/3.5e-90/[TZ] KOG1700 Regulatory protein MLP and related LIM proteins	PF00412/1.3E-9/LIM domain	molecular_function:GO:0008270//zinc ion binding;
