# Supplementary material for: Identification of Transcription Factors Involved in the Regulation of Flowering in Adonis Amurensis Through Combined RNA-seq Transcriptomics and iTRAQ Proteomics
Source: Genes (Basel). 2019 Apr 18;10(4):305. doi: 10.3390/genes10040305 (PMC6523232; doi:10.3390/genes10040305)
Supplement: Supplementary file 1 [file genes-10-00305-s001.zip › Supplementary Table S2.xls]

## Sheet: Table S2
Table S2. List of qPCR primers
primer name	primer sequence (5'-3')
Unigene7086-qF	CCTAAACTTTCAAGGCAACACAA
Unigene7086-qR	CTACGACGAGGAGCCACACAA
CL28019.Contig1-qF	TAGGGCTTCTACTCTTGCTTTGA
CL28019.Contig1-qR	GTTATGGAGGACCAGAACCGAA
CL7507.Contig2-qF	TGGAAATGAACGGGAATGTGAG
CL7507.Contig2-qR	CTGTAGATTAGGCTGGATTGGGT
CL7813-qF	ACCGCACCTACTGGAACATAAA
CL7813-qR	TAAGGCTGAATCAAGTGGCAAT
Unigene27591-qF	GACTCACGAGACGGTATTTTGTT
Unigene27591-qR	TTCCTAAATCCACACTTTTGCTG
CL21065-qF	TATGCGAAGTGCCAAACAGAAT
CL21065-qR	TATTTCCCAAGCATTAGAGCCC
CL12256-qF	CTTACACCACCCTCTCCCATCTA
CL12256-qR	ATTCTGACTTGGCATTATCCGTG
CL980-qF	TCTCTCAATGCGTTCTTCTGC
CL980-qR	ATTCTTTGGTCTGTTGGGGTC
CL8283-qF	CTCCTTCACCTTTGCTGTTTTCT
CL8283-qR	CTGGCATTGTCTGTCAGTTTGTT
CL5122-qF	AGCAACCAGTCTCTCCTTCAAAT
CL5122-qR	TGGACAACGATTCTGTTCTTCAC
U27250-qF	TTGTTTTGCTTTACCTGTCCGT
U27250-qR	CGTTTTATCTTGCTGCTCCTTT
U27263-qF	TTGTTATCTTTGGTGTGCTGCTC
U27263-qR	GTCTACGAAGTTGTGACTGGGAA
CL21157-qF	ATCTTTCTTGCCAGGTCTCGTC
CL21157-qR	ATTGATACCCTTCACACCCCAT
Unigene924-qF	CAACAACATCTTCTACACCCACC
Unigene924-qR	TCCCTTTTCTTATCTCGCTCTCT
CL25169-qF	AAGATGAAGAGGCGTCAAACCA
CL25169-qR	AGCCAAAGAAATCAGCCAGGA
CL5861-qF	CTGGAGAGGGAGTTACTGAATGA
CL5861-qR	GATGATTCCTTTGGGGAGTTG
CL14811-qF	AAAGACAAAGGTGACGACAATGC
CL14811-qR	TCCTGAAGATGAACCAGAGCACT
Unigene10552-qF	GTCATCGTTGAGCCCAGTTTTAT
Unigene10552-qR	AGTCATTTTCTCACGGGATTTCA
CL12788-qF	TTTGGTAGCCATTGCTGTTGTT
CL12788-qR	CCTGGAGGGAGTGGAAATCAT
CL25724-qF	TAAGGTTCAGAGGAAGCAGAGCC
CL25724-qF	TGTGAAACTGTCGTCAAAAGGCT
Unigene27365-qF	GACTTCTGGTGGTGTTGGTTCA
Unigene27365-qR	AGTCGCTCTTCTCGGAGTCAAT
CL20827-qF	CCAAAGGAACTCAACAACAGACA
CL20827-qR	CTTGCTCGGCTTCTTTTGTATC
CL22852-qF	GAGGAGGGGGAGTAGGAAAAG
CL22852-qR	AAGTATGGTGGAAGAAGGAGCA
Unigene8129-qF	CGAGGATGTGAAACCGACGAT
Unigene8129-qR	TGAACCTGTGTTTGTGCCTGAG
CL27218-qF	TACAGGCAGAACCTTCACCAACT
CL27218-qR	GAATCCACCATCAGAAACAACAG
CL6705-qF	ACGCTGGTTGACTCTGTATTGGA
CL6705-qR	GCTGACAAGATAGTGGAAGGTGC
CL22853-qF	TAAGAGGATTGAGAGACAGGCGT
CL22853-qR	TCATTTTTAGCAACATTGAGCAG
CL11970-qF	ATGATGGGATTGATGCTGAAGG
CL11970-qR	ACTACCCGCCTGACTTGCTCT
AaActin-qF	TCTCAACCCCAAGGCTAACAG
AaActin-qR	CATCACCAGAGTCCAGCACAAT
